# Supplementary material for: Set-Up and Validation of a High Throughput Screening Method for Human Monoacylglycerol Lipase (MAGL) Based on a New Red Fluorescent Probe
Source: PubMed Central journal article supplement (PMC6631453; doi:10.3390/molecules24122241), 2019-06-15

# Supplemental Material

## “Set-up and Validation of a High Throughput Screening Method for Human Monoacylglycerol Lipase (MAGL) Based on a New Red Fluorescent Probe”.

Matteo Miceli<sup>1</sup>, Silvana Casati<sup>1</sup>, Roberta Ottria<sup>1</sup>, Simone Di Leo<sup>2</sup>, Ivano Eberini<sup>3</sup>, Luca Palazzolo<sup>3</sup>, Chiara Parravicini<sup>3</sup>, and Pierangela Ciuffreda<sup>1,\*</sup>

<sup>1</sup> Dipartimento di Scienze Biomediche e Cliniche “Luigi Sacco”, Università degli Studi di Milano, Via G.B. Grassi 74, 20157 Milano, Italy; matteo.miceli@unimi.it (M.M.), silvana.casati@unimi.it (S.C.), roberta.ottria@unimi.it (R.O.); pierangela.ciuffreda@unimi.it (P.C.);

<sup>2</sup> Dipartimento di Biotecnologie Mediche e Medicina Traslazionale, Università degli Studi di Milano, Via Fratelli Cervi 93, 20090, Segrate (MI), Italy; simone.dileo@unimi.it (S.DL.);

<sup>3</sup> Dipartimento di Scienze Farmacologiche e Biomolecolari, Via Balzaretti 9, 20133 Milano, Università degli Studi di Milano, Italy; ivano.eberini@unimi.it (I.E.), luca.palazzolo@unimi.it (L.P.), chiara.parravicini@unimi.it (C.P.);

### Table of Contents

#### Tables

|                                                                                                      |           |
|------------------------------------------------------------------------------------------------------|-----------|
| Table S1. Mobile phases used for the separation of synthesis products.                               | Pag. 2    |
| Table S2. Ligand: MAGL interactions.                                                                 | Pag. 3    |
| Table S3. Decay times and corresponding radius.                                                      | Pag. 4    |
| Table S4. Assignment of <sup>1</sup> H and <sup>13</sup> C-NMR Chemical Shift in CDCl <sub>3</sub> . | Pag. 7-10 |

#### Figures

Figure S1. Comparison between spontaneous hydrolysis of **1a-d**, **1f**, and **1h-k** at lowest (circles) and highest (squares) concentrations assessed (5 μM and 25 μM). For all compounds, data have been normalized subtracting the t<sub>0</sub> fluorescence value from all the next fluorescence value read. Data are mean ± standard error of independent experiments. Pag. 3

Figure S2: Time correlation functions for the scattered intensity (at θ = 90°). Red dashed lines: double exponential fit. The fastest decay time is of the order of fractions of μs which does not correspond to diffusive motion. Whereas the slower decay times reveal nano-sized particles. The corresponding decay times and radius are reported in Tab.3S. Pag. 4

Figure S3. Binding poses of tested compounds into the MAGL binding site. MAGL is represented as ribbons; tested compounds and Ser122 are represented as sticks without hydrogen atoms. Pag. 5

Figure S4: MAGL complexes. Compound **1b** (A) and **1c** (B) are shown in orange and yellow sticks, respectively; only MAGL residues participating to the binding site are reported in stick representation; green traces point out residues involved in hydrophobic interactions. Pag. 5

Figure S5. IUPAC numbering of 7-hydroxyresorufinyl moiety. Pag. 6

#### <sup>1</sup>H and <sup>13</sup>C-NMR data

|                                                                                                        |         |
|--------------------------------------------------------------------------------------------------------|---------|
| <sup>1</sup> H and <sup>13</sup> C NMR spectra of 7-hydroxyresorufinyl-acetate ( <b>1a</b> )           | Pag. 11 |
| <sup>1</sup> H and <sup>13</sup> C NMR spectra of 7-hydroxyresorufinyl-butyrate ( <b>1b</b> )          | Pag. 13 |
| <sup>1</sup> H and <sup>13</sup> C NMR spectra of 7-hydroxyresorufinyl-octanoate ( <b>1c</b> )         | Pag. 15 |
| <sup>1</sup> H and <sup>13</sup> C NMR spectra of 7-hydroxyresorufinyl-dodecanoate ( <b>1d</b> )       | Pag. 17 |
| <sup>1</sup> H and <sup>13</sup> C NMR spectra of 7-hydroxyresorufinyl-icosanoate ( <b>1e</b> )        | Pag. 19 |
| <sup>1</sup> H and <sup>13</sup> C NMR spectra of 7-hydroxyresorufinyl-oleate ( <b>1f</b> )            | Pag. 21 |
| <sup>1</sup> H and <sup>13</sup> C NMR spectra of 7-hydroxyresorufinyl-arachidonate ( <b>1g</b> )      | Pag. 23 |
| <sup>1</sup> H and <sup>13</sup> C NMR spectra of 7-hydroxyresorufinyl-2-methylhexanoate ( <b>1h</b> ) | Pag. 25 |
| <sup>1</sup> H and <sup>13</sup> C NMR spectra of 7-hydroxyresorufinyl-2-ethylhexanoate ( <b>1i</b> )  | Pag. 27 |
| <sup>1</sup> H and <sup>13</sup> C NMR spectra of 7-hydroxyresorufinyl-2-butyloctanoate ( <b>1j</b> )  | Pag. 29 |
| <sup>1</sup> H and <sup>13</sup> C NMR spectra of 7-hydroxyresorufinyl-2-benzoate ( <b>1k</b> )        | Pag. 31 |

**Table S1:** Mobile phases used for the separation of synthesis products.

| Compound(s) | Yields | Mobile phase                                                                                            | m.p.                    |
|-------------|--------|---------------------------------------------------------------------------------------------------------|-------------------------|
| <b>1a</b>   | 65%    | CH <sub>2</sub> Cl <sub>2</sub> /acetone, 98:2                                                          | 220-221 °C <sup>a</sup> |
| <b>1b</b>   | 71%    | Petroleum ether/AcOEt gradient, from 7:3 to 5:5.                                                        | 138-140 °C <sup>a</sup> |
| <b>1c</b>   | 68%    | Petroleum ether/AcOEt 8:2.                                                                              | 111-112 °C              |
| <b>1d</b>   | 72%    | Petroleum ether/AcOEt gradient, from 8:2 to 7:3.                                                        | 117-119 °C              |
| <b>1e</b>   | 75%    | CH <sub>2</sub> Cl <sub>2</sub> /acetone, 98:2                                                          | 124-125 °C              |
| <b>1f</b>   | 66%    | Petroleum ether/AcOEt 8:2.                                                                              | 82 °C                   |
| <b>1g</b>   | 62%    | CH <sub>2</sub> Cl <sub>2</sub> /acetone, 98:2                                                          | Oil <sup>b</sup>        |
| <b>1h</b>   | 90%    | Petroleum ether/AcOEt 75:25.                                                                            | 144-145 °C              |
| <b>1i</b>   | 82%    | CH <sub>2</sub> Cl <sub>2</sub> /acetone, 98:2                                                          | 124-125 °C              |
| <b>1j</b>   | 92%    | CH <sub>2</sub> Cl <sub>2</sub> /acetone, 98:2                                                          | 94-96 °C                |
| <b>1k</b>   | 92%    | Petroleum ether/ AcOEt 9:1 to remove side products, then CH <sub>2</sub> Cl <sub>2</sub> /acetone 98:2. | 259-261 °C <sup>a</sup> |

<sup>a</sup> Guilbault, G.G., and Kramer, D.N. (1965). Resorufin Butyrate and Indoxyl Acetate as Fluorogenic Substrates for Cholinesterase. *Analytical Chemistry*, 37(1), 120-123.

<sup>b</sup> Lauria, S., Casati, S., and Ciuffreda, P. (2015). Synthesis and characterization of a new fluorogenic substrate for monoacylglycerol lipase and application to inhibition studies. *Analytical and Bioanalytical Chemistry*, 407(26), 8163–8167. <https://doi.org/10.1007/s00216-015-8991-9>

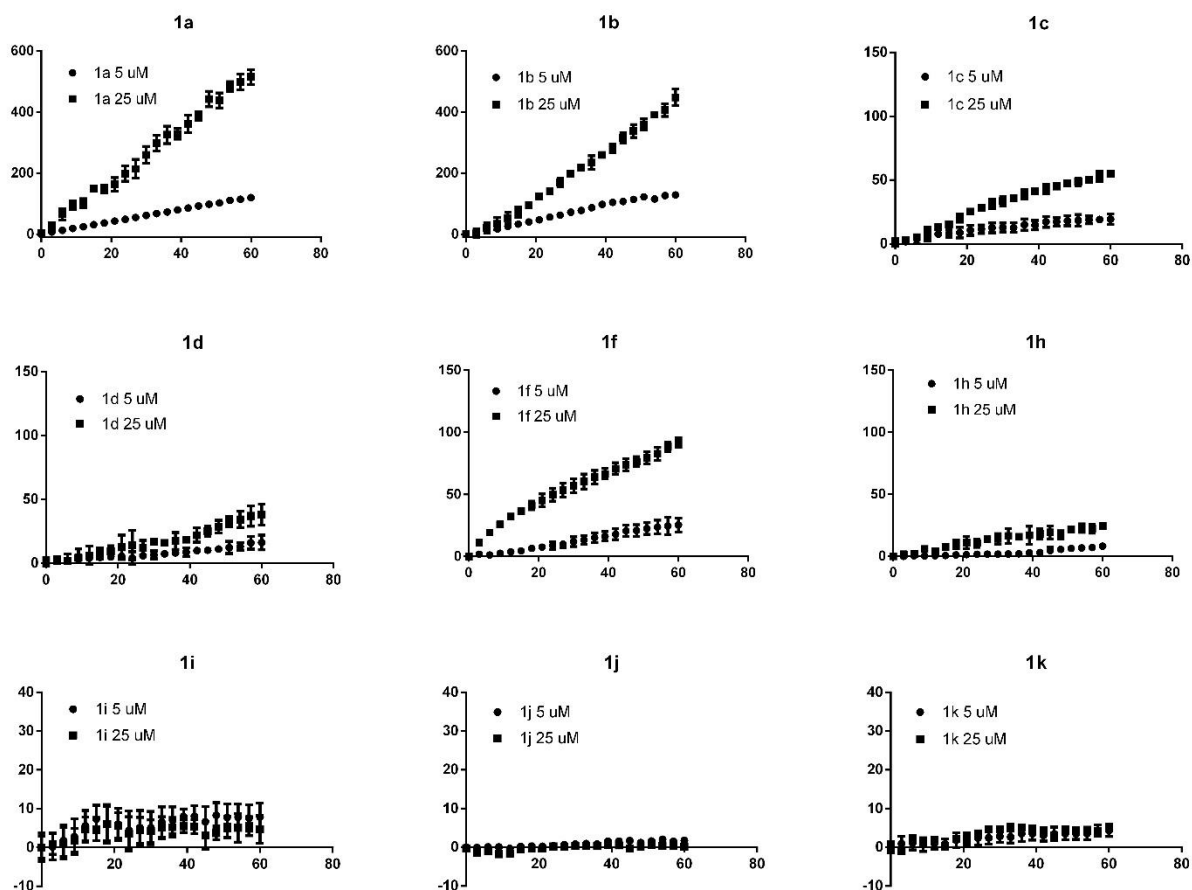

**Figure S1:** Comparison between spontaneous hydrolysis of **1a-d**, **1f**, and **1h-k** at lowest (circles) and highest (squares) concentrations assessed (5  $\mu\text{M}$  and 25  $\mu\text{M}$ ). For all compounds, data have been normalized subtracting the  $t_0$  fluorescence value from all the next fluorescence value read. Data are mean  $\pm$  standard error of independent experiments.

**Table S2:** Ligand: MAGL interactions.

| Compound  | H-bond                | Pi-Pi interaction |
|-----------|-----------------------|-------------------|
| <b>1a</b> | Ala51, Met123         | His269            |
| <b>1b</b> | Ala51, Met123         | His269            |
| <b>1c</b> | Ala51                 | His269            |
| <b>1d</b> | Ala51                 | His121, His269    |
| <b>1e</b> | Ser122                | His121, His269    |
| <b>1f</b> | Ser122                |                   |
| <b>1g</b> | Ala51, Ser122, Met123 | His121, His269    |
| <b>1h</b> | Ala51, Met123         | His121, His269    |
| <b>1i</b> | Ala51, Met123         | His121, His269    |
| <b>1j</b> | Ala51                 |                   |
| <b>1k</b> | Ala51                 | His121            |

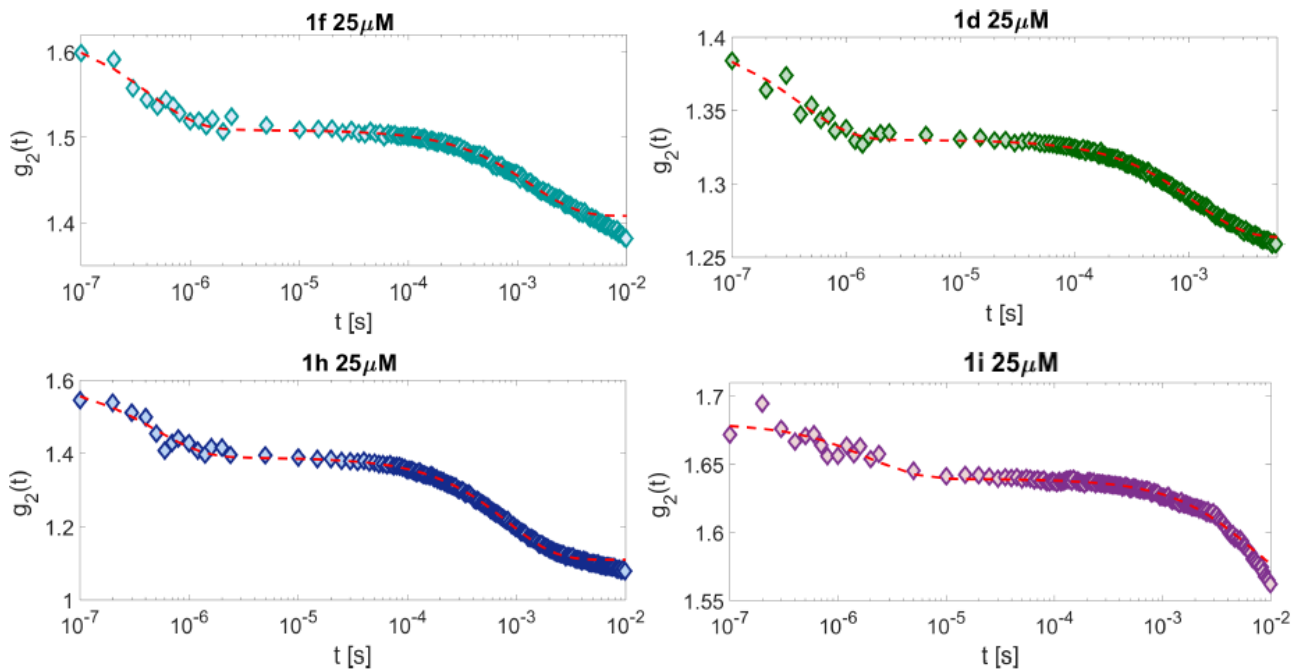

**Figure S2:** Time correlation functions for the scattered intensity (at  $\theta = 90^\circ$ ). Red dashed lines: double exponential fit. The fastest decay time is of the order of fractions of  $\mu$ s which does not correspond to diffusive motion. Whereas the slower decay times reveal nano-sized particles. The corresponding decay times and radius are reported in Tab.3S.

**Table S3:** Decay times and corresponding radius.

| SAMPLE    | $\tau$ [ms]   | R [nm]         |
|-----------|---------------|----------------|
| <b>1f</b> | $2.7 \pm 0.2$ | $287 \pm 25$   |
| <b>1d</b> | $2.3 \pm 0.2$ | $246 \pm 16$   |
| <b>1h</b> | $1.7 \pm 0.1$ | $182 \pm 13$   |
| <b>1i</b> | $13 \pm 8$    | $1390 \pm 860$ |

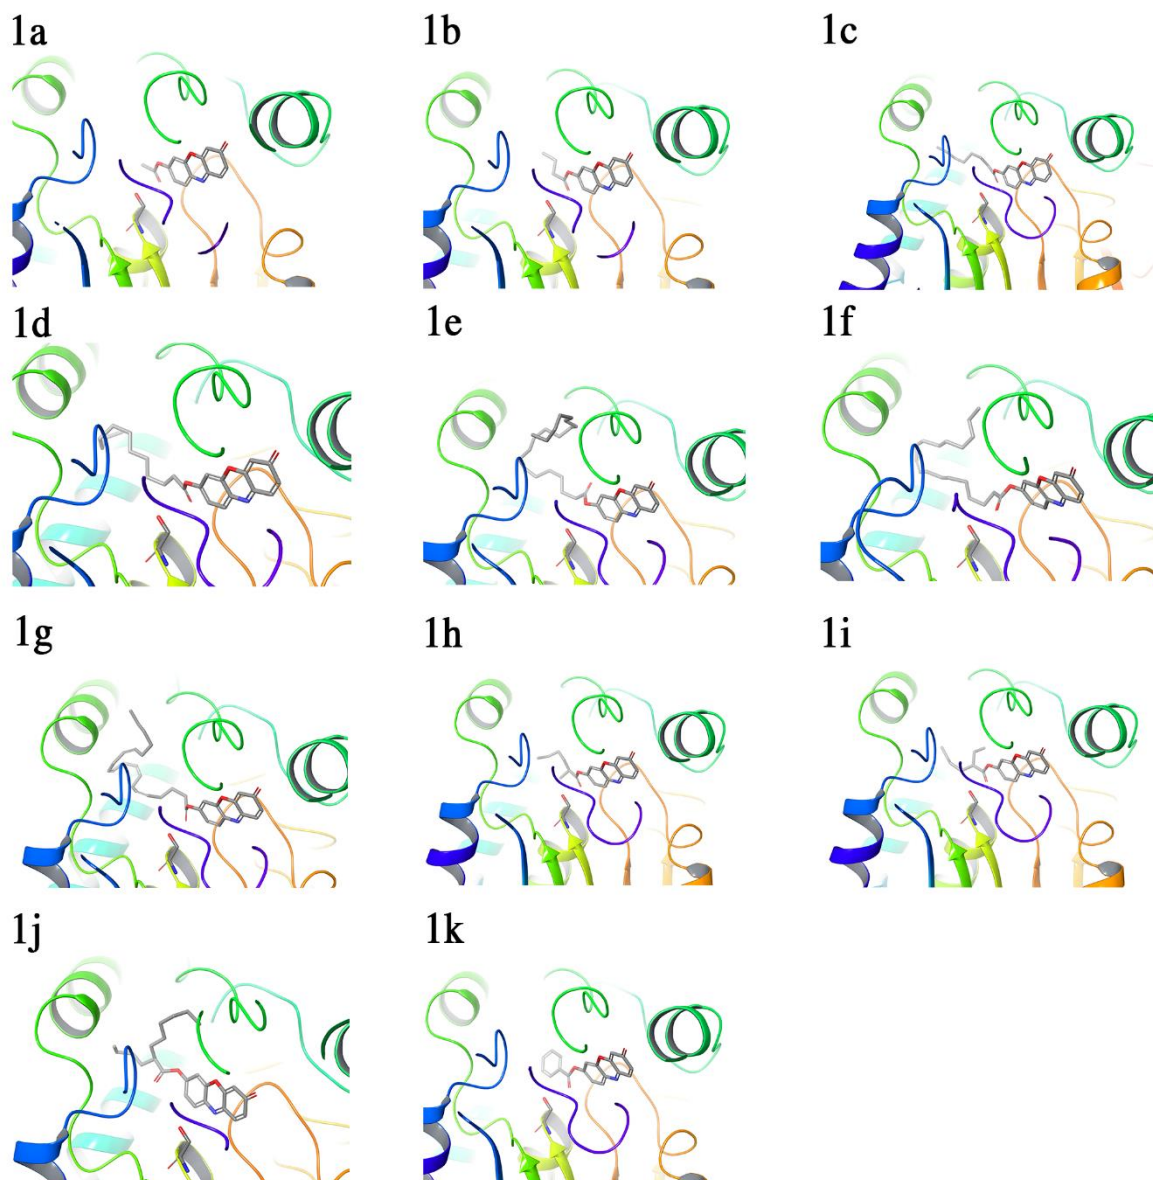

**Figure S3:** Binding poses of tested compounds into the MAGL binding site. MAGL is represented as ribbons; tested compounds and Ser122 are represented as sticks without hydrogen atoms.

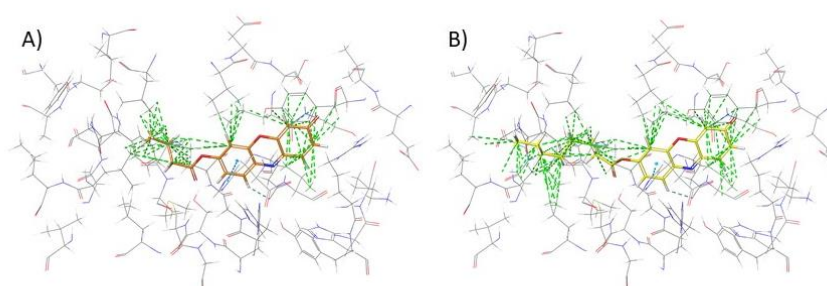

**Figure S4:** MAGL complexes. Compound **1b** (A) and **1c** (B) are shown in orange and yellow sticks, respectively; only MAGL residues participating to the binding site are reported in stick representation; green traces point out residues involved in hydrophobic interactions.

## $^1\text{H}$ and $^{13}\text{C}$ -NMR data

### *Instruments*

$^1\text{H}$ -NMR spectra were recorded in  $\text{CDCl}_3$  (isotopic enrichment 99.95%) solutions at 300 K using a Bruker AVANCE 500 instrument (500.13 MHz for  $^1\text{H}$ , 125.76 MHz for  $^{13}\text{C}$ ) using 5 mm inverse detection broadband probes and deuterium lock. Chemical shifts ( $\delta$ ) are given as parts per million relative to the residual solvent peak (7.26 ppm for  $^1\text{H}$ ) and coupling constants ( $J$ ) are in Hertz. The experimental error in the measured  $^1\text{H}$ - $^1\text{H}$  coupling constants is  $\pm 0.5$  Hz. The splitting pattern abbreviations are as follows: s, singlet; d, doublet; t, triplet; q, quartet; m, multiplet, and bs, broad peak. For two-dimensional experiments, Bruker microprograms using gradient selection (gs) were applied.

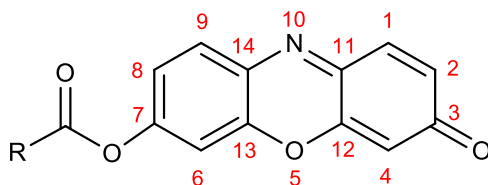

**Figure S5.** IUPAC numbering of 7-hydroxyresorufinyl moiety.

**Table S4.** Assignment of  $^1\text{H}$  and  $^{13}\text{C}$ -NMR Chemical Shift in  $\text{CDCl}_3$ .

|                                       | <i>1a</i>             |              | <i>1c</i>             |              | <i>1b</i>        |              | <i>1f</i>                        |                            | <i>1k</i>        |              | <i>1d</i>        |              |
|---------------------------------------|-----------------------|--------------|-----------------------|--------------|------------------|--------------|----------------------------------|----------------------------|------------------|--------------|------------------|--------------|
|                                       | $\delta$ (H)          | $\delta$ (C) | $\delta$ (H)          | $\delta$ (C) | $\delta$ (H)     | $\delta$ (C) | $\delta$ (H)                     | $\delta$ (C)               | $\delta$ (H)     | $\delta$ (C) | $\delta$ (H)     | $\delta$ (C) |
| CH(1)                                 | 7.46 (d)<br>9.8       | 134.8        | 7.47<br>9.8           | 134.9        | 7.46<br>9.9      | 134.8        | 7.46<br>9.8                      | 134.8                      | 7.49<br>9.8      | 134.8        | 7.47<br>9.8      | 134.8        |
| CH(2)                                 | 6.89 (dd)<br>9.8, 2.0 | 135.2        | 6.90<br>9.8, 2.0      | 135.1        | 6.89<br>9.9, 2.1 | 135.1        | 6.90<br>9.8, 2.0                 | 135.1                      | 6.91<br>9.8, 2.0 | 135.2        | 6.90<br>9.8, 2.0 | 135.1        |
| C(3)                                  |                       | 186.3        |                       | 186.3        |                  | 186.3        |                                  | 186.3                      |                  | 186.3        |                  | 186.3        |
| CH(4)                                 | 6.36 (d)<br>2.0       | 107.2        | 6.37<br>2.0           | 107.2        | 6.36<br>2.1      | 107.2        | 6.36<br>2.0                      | 107.2                      | 6.38<br>2.0      | 107.3        | 6.37<br>2.0      | 107.2        |
| CH(6)                                 | 7.18 (d)<br>2.4       | 109.7        | 7.18<br>2.4           | 109.7        | 7.18<br>2.4      | 109.7        | 7.17<br>2.4                      | 109.7                      | 7.32<br>2.4      | 109.9        | 7.18<br>2.4      | 109.7        |
| C(7)                                  |                       | 153.5        |                       | 153.7        |                  | 153.6        |                                  | 153.7                      |                  | 153.8        |                  | 153.7        |
| CH(8)                                 | 7.15 (dd)<br>8.6, 2.4 | 119.3        | 7.15<br>8.6, 2.4      | 119.3        | 7.15<br>8.6, 2.4 | 119.3        | 7.15<br>8.6, 2.4                 |                            | 7.30<br>8.6, 2.4 | 119.4        | 7.15<br>8.6, 2.4 | 119.3        |
| CH(9)                                 | 7.82 (d)<br>8.6       | 131.1        | 7.83<br>8.6           | 131.1        | 7.82<br>8.6      | 131.1        | 7.83<br>8.6                      |                            | 7.89<br>8.6      | 134.2        | 7.83<br>8.6      | 131.1        |
| C(11)                                 |                       | 148.3        |                       | 148.2        |                  | 148.2        |                                  | 148.2                      |                  | 148.3        |                  | 148.2        |
| C(12)                                 |                       | 149.3        |                       | 149.3        |                  | 149.3        |                                  | 149.3                      |                  | 149.3        |                  | 149.3        |
| C(13)                                 |                       | 144.3        |                       | 144.4        |                  | 144.3        |                                  | 144.4                      |                  | 144.5        |                  | 144.4        |
| C(14)                                 |                       | 131.2        |                       | 131.2        |                  | 131.1        |                                  | 131.2                      |                  | 131.2        |                  | 131.2        |
| COO                                   |                       | 168.5        |                       | 171.4        |                  | 171.2        |                                  | 171.4                      |                  | 164.4        |                  | 171.4        |
| OCOCH <sub>2</sub>                    |                       |              | 2.63 (t)<br>7.5       | 34.4         | 2.62<br>7.0      | 36.2         | 2.63<br>7.0                      | 34.4                       |                  |              | 2.63<br>7.5      | 34.4         |
| CO<br>CH <sub>2</sub> CH <sub>2</sub> |                       |              | 1.79 (tt)<br>7.5, 7.5 | 31.6         | 1.84<br>7.0, 7.4 | 18.3         | 1.80<br>7.0, 7.0                 | 22.7                       |                  |              | 1.79<br>7.5, 7.5 | 24.8         |
| CH=CH                                 |                       |              |                       |              |                  |              | 5.42-5.34<br>(2H, m,<br>9', 10') | 129.7 (9'),<br>130.1 (10') |                  |              |                  |              |

|                                   |      |      |                                  |                              |             |      |                                  |                                                                                                      |                 |       |                                   |                                                            |
|-----------------------------------|------|------|----------------------------------|------------------------------|-------------|------|----------------------------------|------------------------------------------------------------------------------------------------------|-----------------|-------|-----------------------------------|------------------------------------------------------------|
| CH=CH-<br>CH <sub>2</sub>         |      |      |                                  |                              |             |      | 2.08-2.02<br>(4H, m,<br>8', 11') | 27.1 (8'),<br>27.2 (11')                                                                             |                 |       |                                   |                                                            |
| CH <sub>2</sub> -FAC <sup>a</sup> |      |      | 1.27-1.47<br>(20 H, m,<br>4'-7') | 29.0,<br>28.9,<br>24.8, 24.7 |             |      | 1.45-1.26<br>(20 H, m,<br>17')   | 22.7 (17'),<br>29.0, 29.1,<br>29.2, 29.4,<br>29.5, 29.6, 29.7<br>(4'-7' and 12'-<br>15'), 31.9 (16') |                 |       | 1.47-1.24<br>(16 H, m,<br>4'-11') | 22.7, 29.1,<br>29.2, 29.3,<br>29.5, 29.6,<br>31.9 (4'-11') |
| CH <sub>3</sub>                   | 2.38 | 21.2 | 0.93<br>7.0                      | 14.1                         | 1.09<br>7.4 | 13.6 |                                  | 14.1                                                                                                 |                 |       |                                   |                                                            |
| <i>o</i> -H <sub>ar</sub>         |      |      |                                  |                              |             |      |                                  |                                                                                                      | 8.24 (d)<br>7.7 | 130.4 |                                   |                                                            |
| <i>m</i> -H <sub>ar</sub>         |      |      |                                  |                              |             |      |                                  |                                                                                                      | 7.58 (t)<br>7.7 | 128.8 |                                   |                                                            |
| <i>p</i> -H <sub>ar</sub>         |      |      |                                  |                              |             |      |                                  |                                                                                                      | 7.72 (t)<br>7.7 | 131.2 |                                   |                                                            |

<sup>a</sup>fatty acid chain



## Continued from Table S4...

|                                                         | <i>1j</i>                            |              | <i>1h</i>             |              | <i>1i</i>                |              | <i>1e</i>        |              | <i>1g</i>             |              |
|---------------------------------------------------------|--------------------------------------|--------------|-----------------------|--------------|--------------------------|--------------|------------------|--------------|-----------------------|--------------|
|                                                         | $\delta$ (H)                         | $\delta$ (C) | $\delta$ (H)          | $\delta$ (C) | $\delta$ (H)             | $\delta$ (C) | $\delta$ (H)     | $\delta$ (C) | $\delta$ (H)          | $\delta$ (C) |
| CH(1)                                                   | 7.46 (d)<br>9.8                      | 134.8        | 7.46 (d)<br>9.8       | 134.8        | 7.47 (d)<br>9.8          | 134.8        | 7.46<br>9.8      | 134.8        | 7.46<br>9.8           | 134.8        |
| CH(2)                                                   | 6.89 (dd)<br>9.8, 2.0                | 135.1        | 6.89 (dd)<br>9.8, 2.0 | 135.1        | 6.90<br>(dd)<br>9.8, 2.0 | 135.1        | 6.89<br>9.8, 2.0 | 135.1        | 6.89<br>9.8, 2.0      | 135.2        |
| C(3)                                                    |                                      | 186.3        |                       | 186.3        |                          | 186.3        |                  | 186.3        |                       | 186.3        |
| CH(4)                                                   | 6.36 (d)<br>2.0                      | 107.2        | 6.36 (d)<br>2.0       | 107.2        | 6.36 (d)<br>2.0          | 107.2        | 6.36<br>2.0      | 107.2        | 6.36<br>2.0           | 107.3        |
| CH(6)                                                   | 7.15 (d)<br>2.4                      | 109.7        | 7.16 (d)<br>2.4       | 109.7        | 7.16 (d)<br>2.4          | 109.8        | 7.18<br>2.4      | 109.7        | 7.17<br>2.4           | 109.7        |
| C(7)                                                    |                                      | 153.8        |                       | 153.8        |                          | 153.8        |                  | 153.7        |                       | 153.6        |
| CH(8)                                                   | 7.13 (dd)<br>8.6, 2.4                | 119.4        | 7.14 (dd)<br>8.6, 2.4 | 119.3        | 7.13<br>(dd)<br>8.6, 2.4 | 119.4        | 7.14<br>8.6, 2.4 | 119.3        | 7.14<br>8.6, 2.4      |              |
| CH(9)                                                   | 7.83 (d)<br>8.6                      | 131.1        | 7.83 (d)<br>8.6       | 131.1        | 7.83 (d)<br>8.6          | 131.1        | 7.82<br>8.6      | 131.1        | 7.82<br>8.6           |              |
| C(11)                                                   |                                      | 148.2        |                       | 148.2        |                          | 148.2        |                  | 148.2        |                       | 148.3        |
| C(12)                                                   |                                      | 149.3        |                       | 149.4        |                          | 149.3        |                  | 149.3        |                       | 149.4        |
| C(13)                                                   |                                      | 144.3        |                       | 144.4        |                          | 144.4        |                  | 144.4        |                       | 144.3        |
| C(14)                                                   |                                      | 131.2        |                       | 131.2        |                          | 131.1        |                  | 131.2        |                       | 131.2        |
| COO                                                     |                                      | 174.2        |                       | 174.5        |                          | 174.1        |                  | 171.4        |                       |              |
| OCOCH <sub>n</sub> ( <sub>2,1</sub> )(CH <sub>2</sub> ) | 2.63 (tt)<br>7.0, 7.0                | 45.9         | 2.75 (tq)<br>7.0      | 39.7         | 2.58 (tt)<br>7.7, 7.0    | 47.4         | 2.63<br>7.5      | 34.4         | 2.65 (t)<br>7.0       | 33.7 (2')    |
| OCOCH <sub>n</sub> ( <sub>2,1</sub> )(CH <sub>2</sub> ) | 1.83-1.74<br>(m)<br>1.67-1.59<br>(m) | 32.4<br>32.1 | 1.84 (3')<br>7.0, 7.0 | 33.3         | 1.80 (3')<br>7.4, 7.0    | 33.3         | 1.79<br>7.5, 7.5 | 24.8         | 1.88 (3')<br>7.0, 7.3 | 24.6 (3')    |

|                                   |                             |                                                   |                                |              |                                    |                   |                                   |                                                                       |                                                             |                                                                                               |
|-----------------------------------|-----------------------------|---------------------------------------------------|--------------------------------|--------------|------------------------------------|-------------------|-----------------------------------|-----------------------------------------------------------------------|-------------------------------------------------------------|-----------------------------------------------------------------------------------------------|
| CH=CH                             |                             |                                                   |                                | -            |                                    | -                 |                                   |                                                                       | 5.52-5.33<br>(8H, m,<br>5',6',8',9',<br>11',12', 14',15')   | 130.6,129.5,128.7,<br>128.5,128.4,128.1,1<br>27.8,127.5<br>(5',6',8',9', 11',12',<br>14',15') |
| CH=CH-CH <sub>2</sub>             |                             |                                                   |                                | -            |                                    | -                 |                                   |                                                                       | 2.88-2.82<br>(6H, m, 7', 10',<br>13')                       | 27.7 (7', 10', 13')                                                                           |
| CH <sub>2</sub> -FAC <sup>a</sup> | 1.44-1.28<br>(12 H,<br>m)   | 31.7,<br>29.7,<br>29.2,<br>27.5,<br>22.6,<br>22.6 | 1.64-1.58<br>1.45-1.39<br>(4H) | 29.4<br>22.6 | 1.74-1.62<br>1.46-1.36<br>(6H)     | 31.6 29.6<br>25.4 | 1.46-1.25<br>(32 H, m,<br>4'-19') | 22.7, 248, 29.1,<br>29.2, 29.3, 29.5,<br>29.6, 29.7, 31.9<br>(4'-19') | 2.25 (4', dt)<br>7.0, 7.3<br>1.39-1.28 (6 H,<br>m, 17'-19') | 22.6 (19'), 29.3<br>(17'), 31.5 (18'),<br>26.5 (4'), 27.2 (16')                               |
| CH <sub>3</sub>                   | 0.96 (t)<br>0.92 (t)<br>7.0 | 14.1<br>14.0                                      | 1.34 (d)<br>0.97 (t)<br>7.0    | 10.4<br>16.9 | 1.06 (t)<br>7.4<br>0.97 (t)<br>7.0 | 11.9<br>14.0      | 0.90 (t)<br>7.0                   | 14.1                                                                  | 0.91 (t)<br>7.6                                             | 14.1                                                                                          |

$^1\text{H}$  and  $^{13}\text{C}$  NMR spectra of 7-hydroxyresorufinyl-acetate (**1a**)

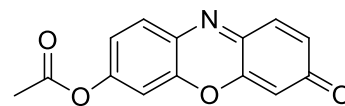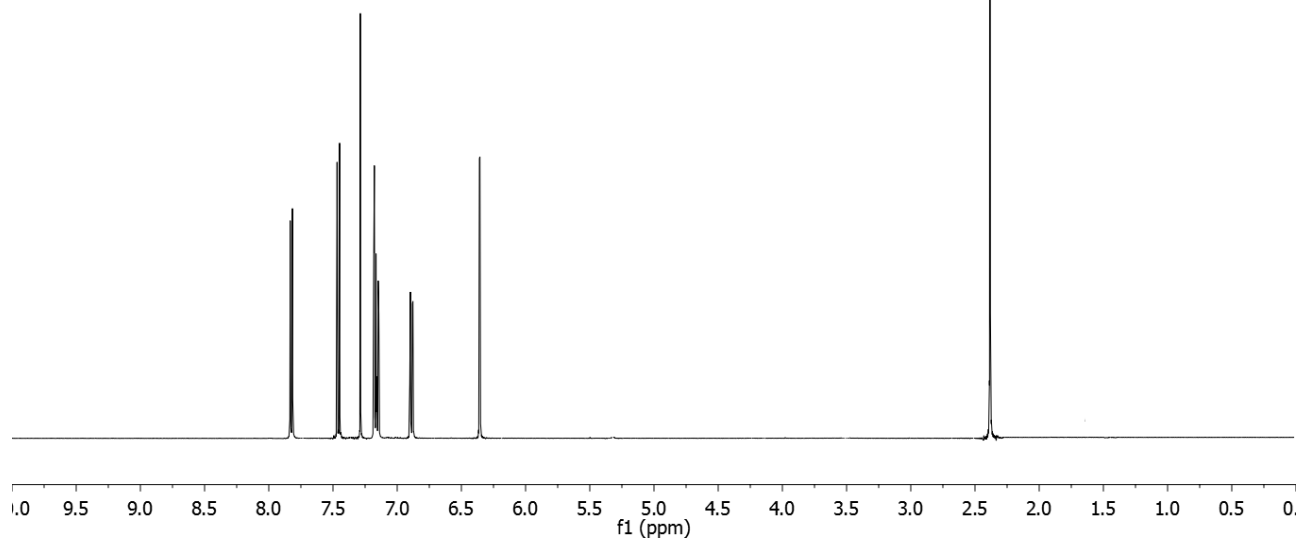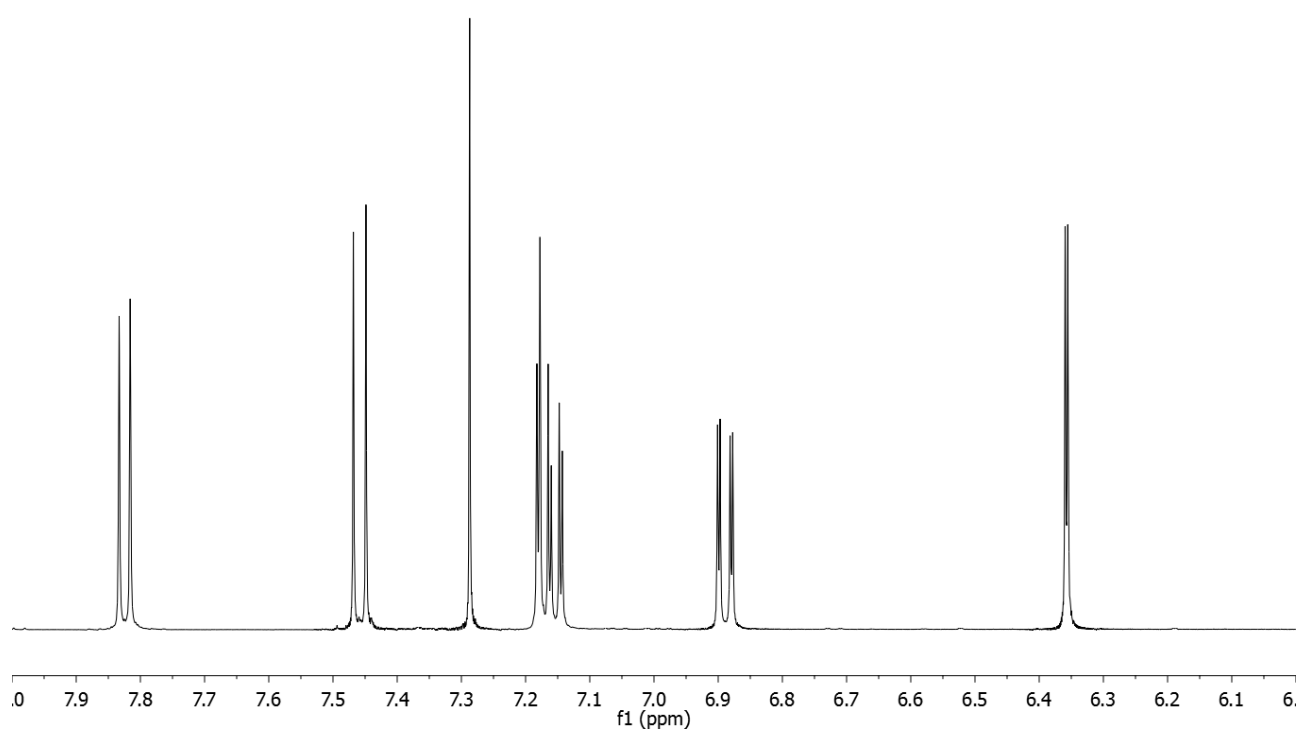

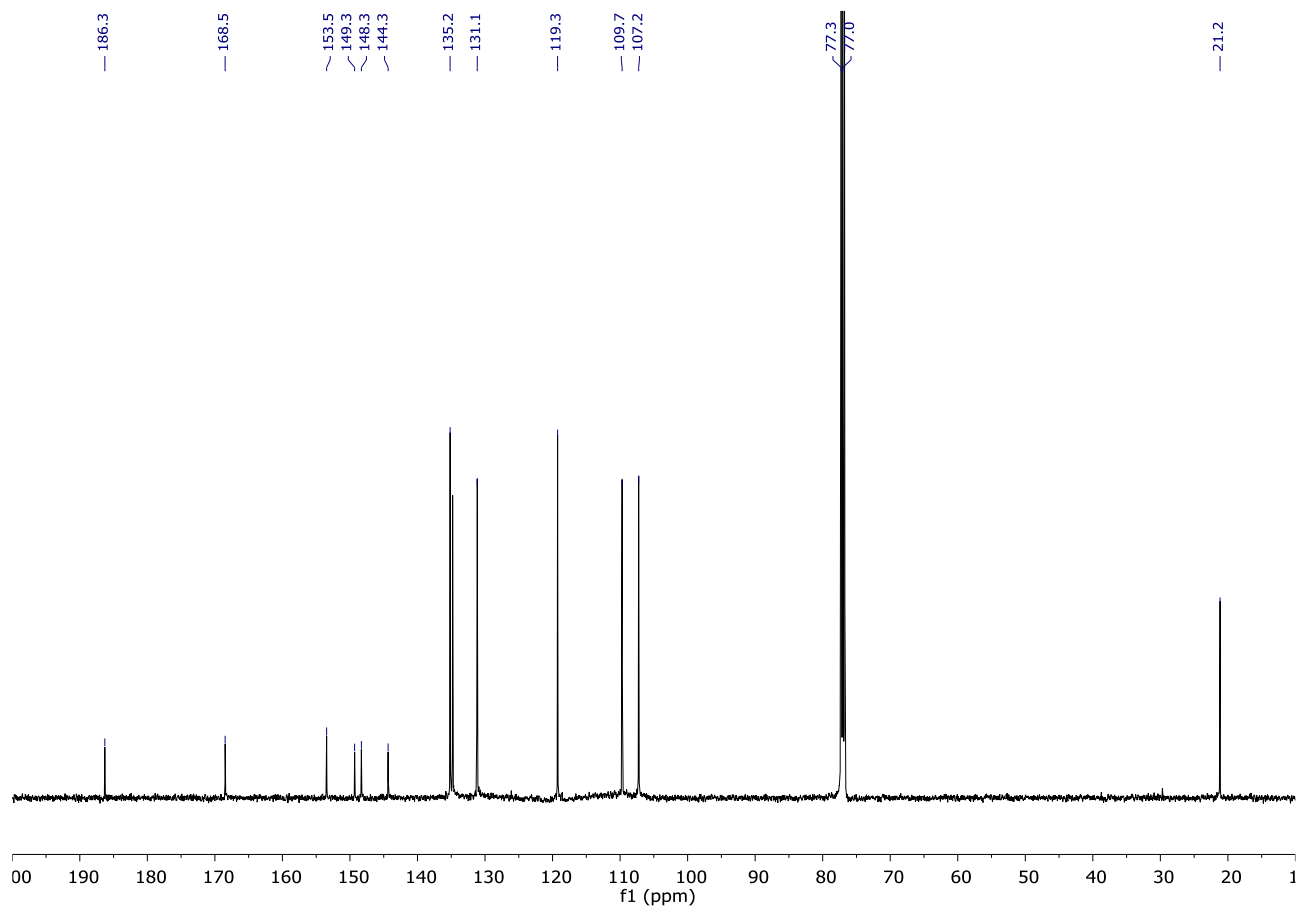

$^1\text{H}$  and  $^{13}\text{C}$  NMR spectra of 7-hydroxyresorufinyl-butylate (**1b**)

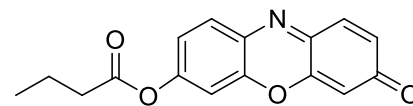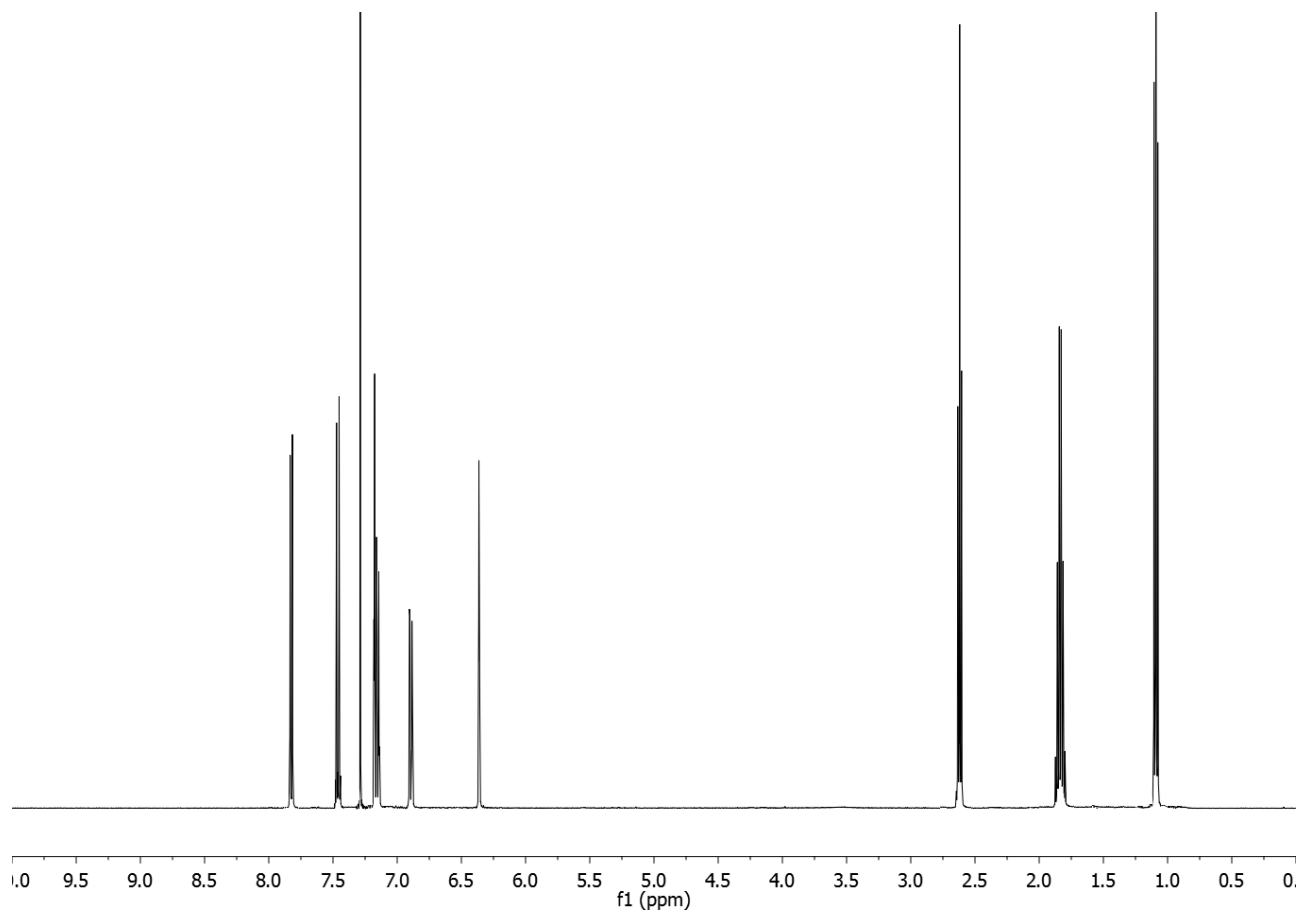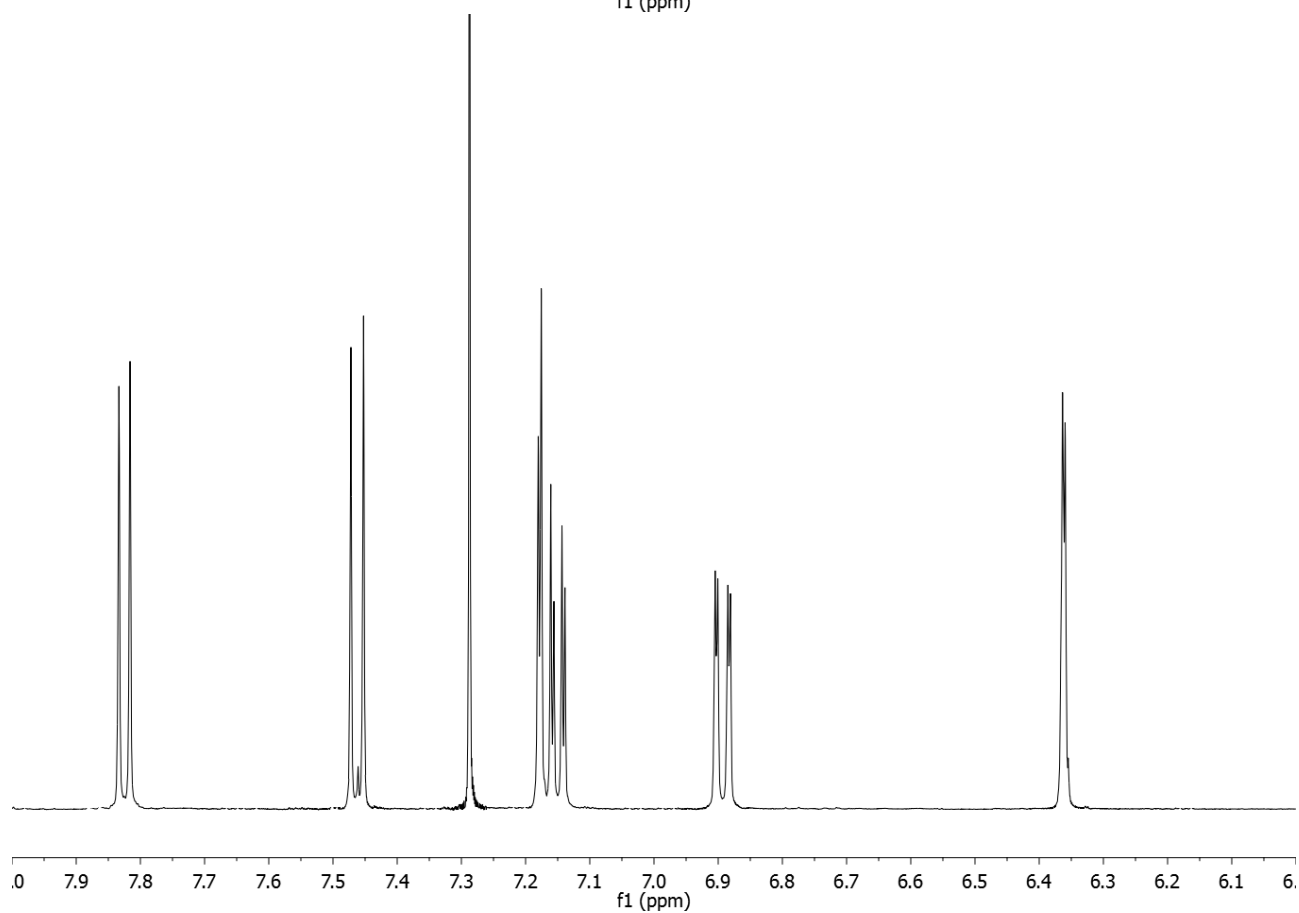

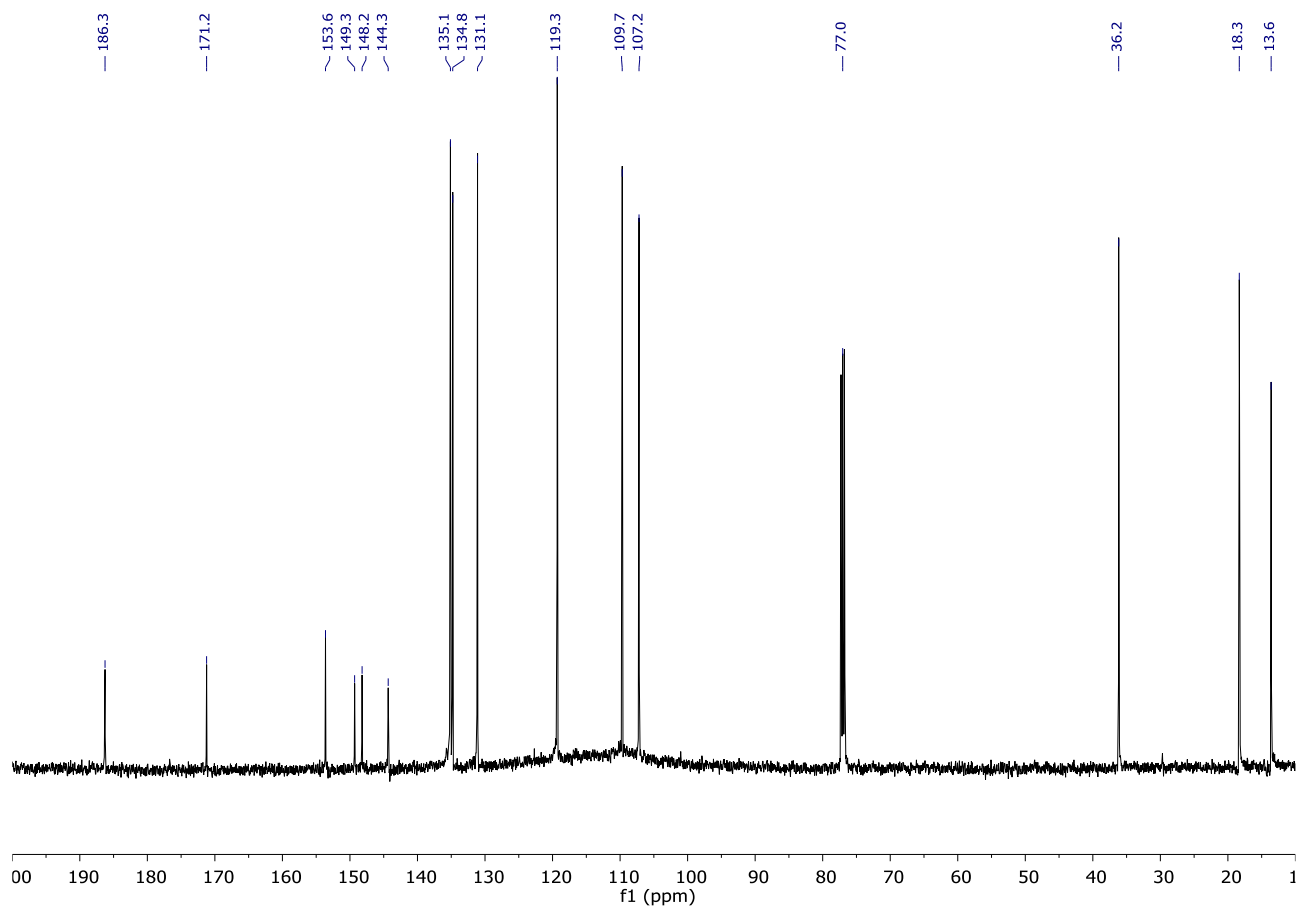

$^1\text{H}$  and  $^{13}\text{C}$  NMR spectra of 7-hydroxyresorufinyl-octanoate (**1c**)

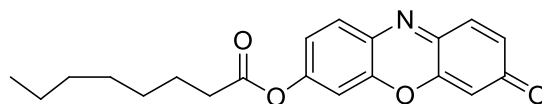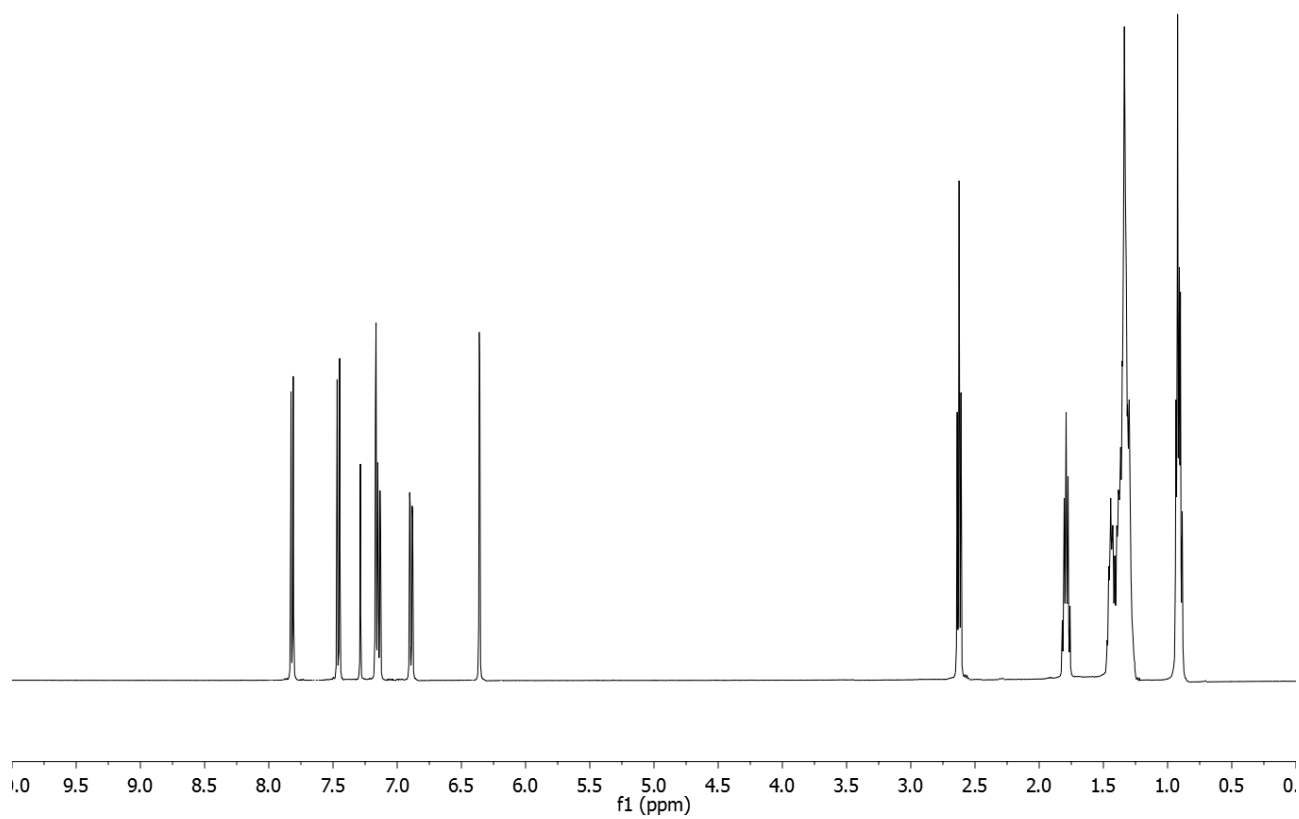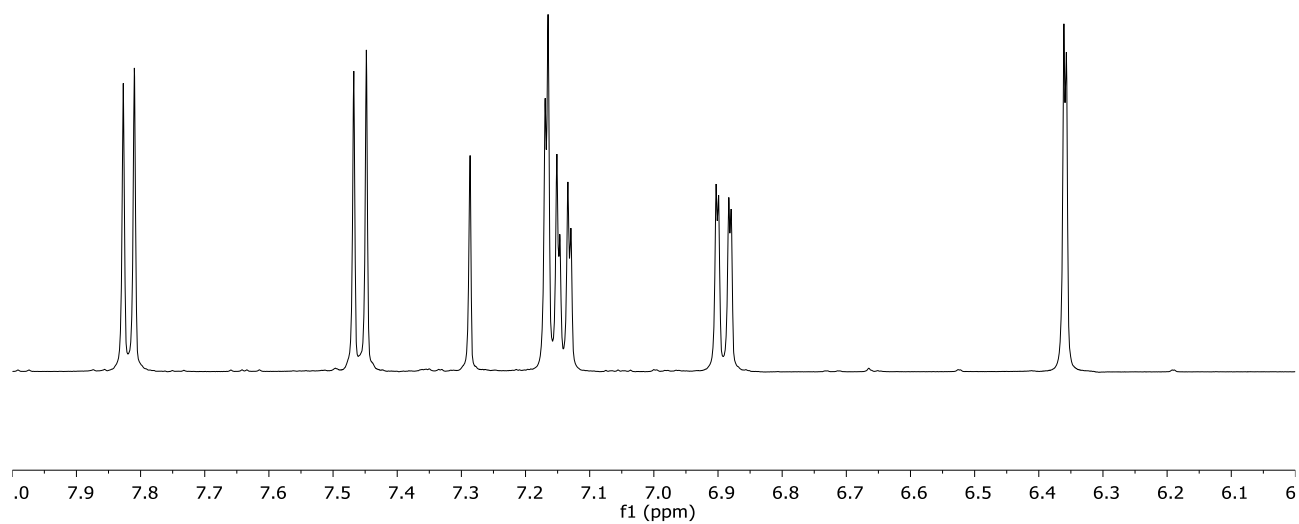

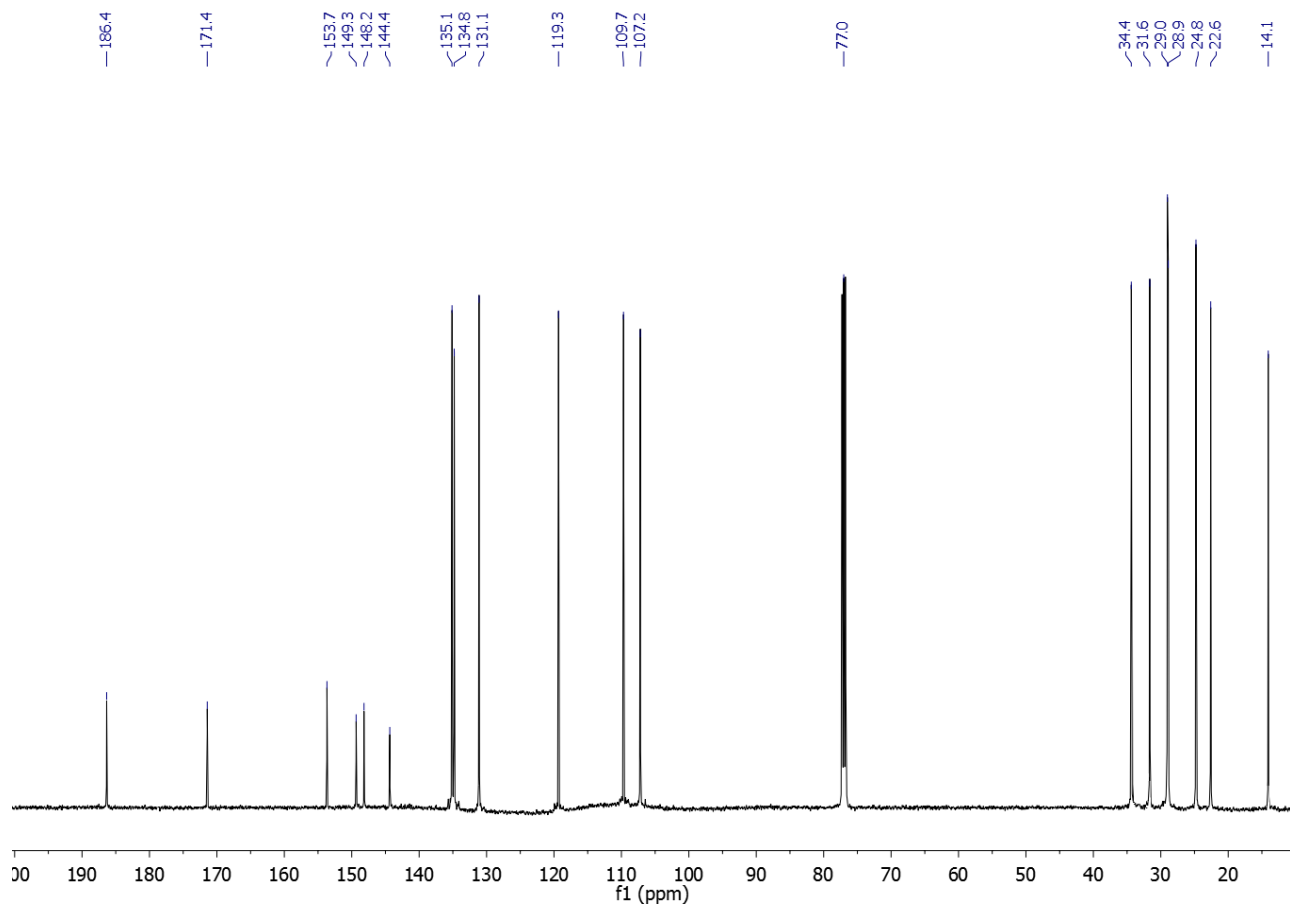



$^1\text{H}$  and  $^{13}\text{C}$  NMR spectra of 7-hydroxyresorufinyl-dodecanoate (**1d**)

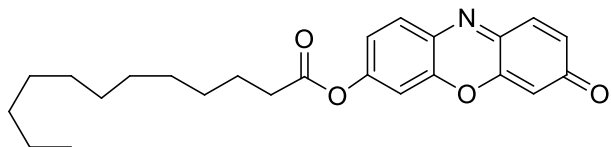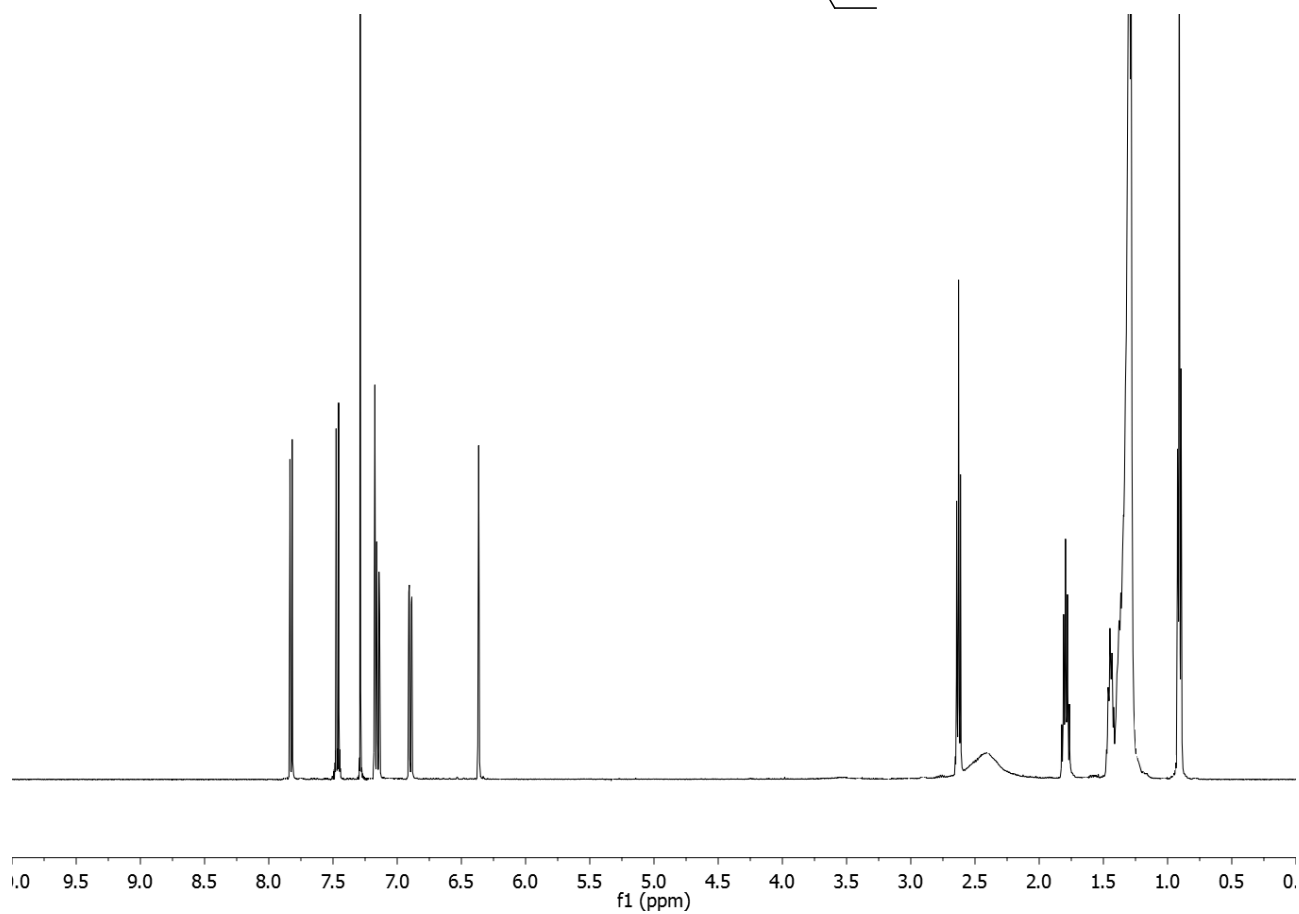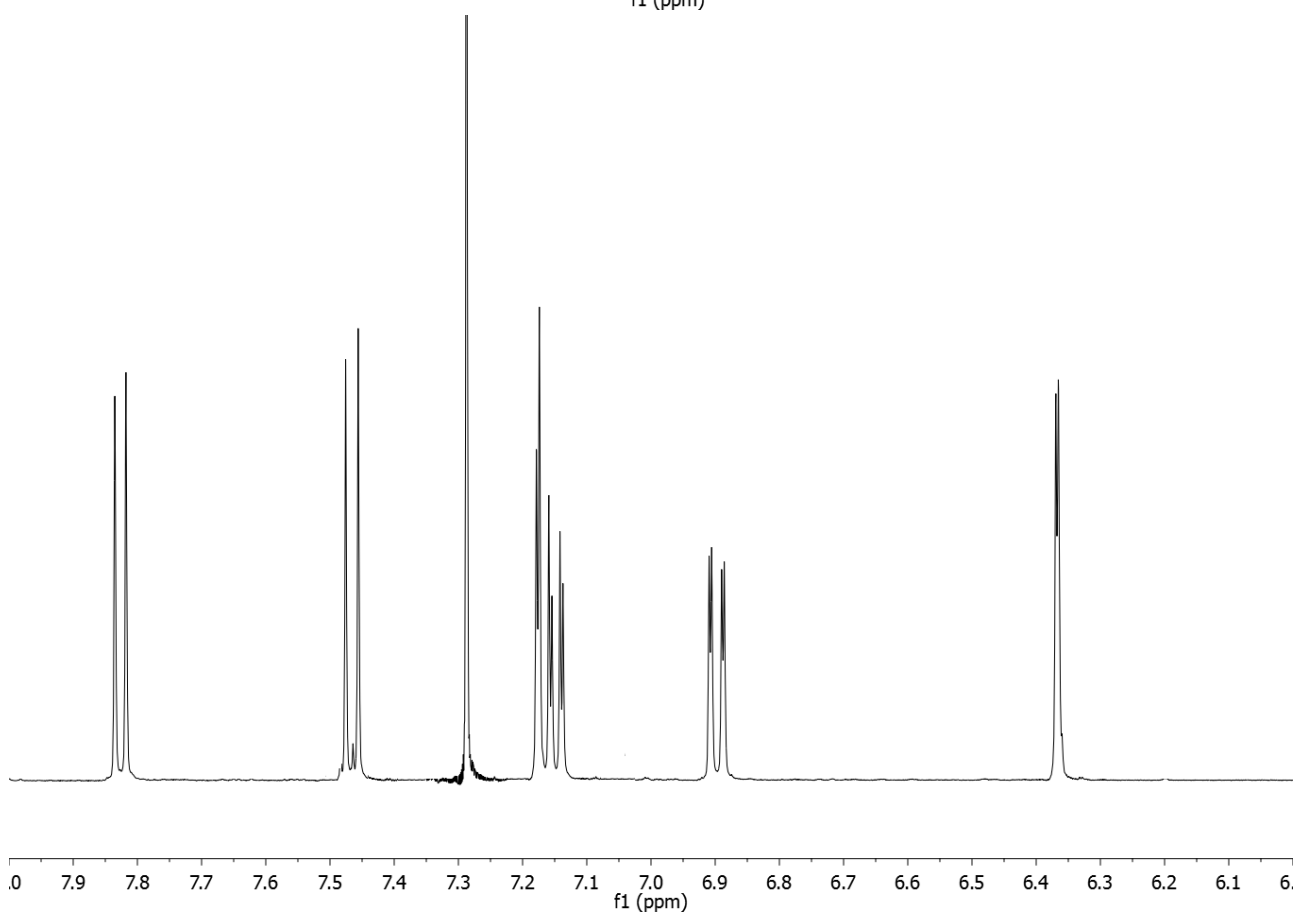

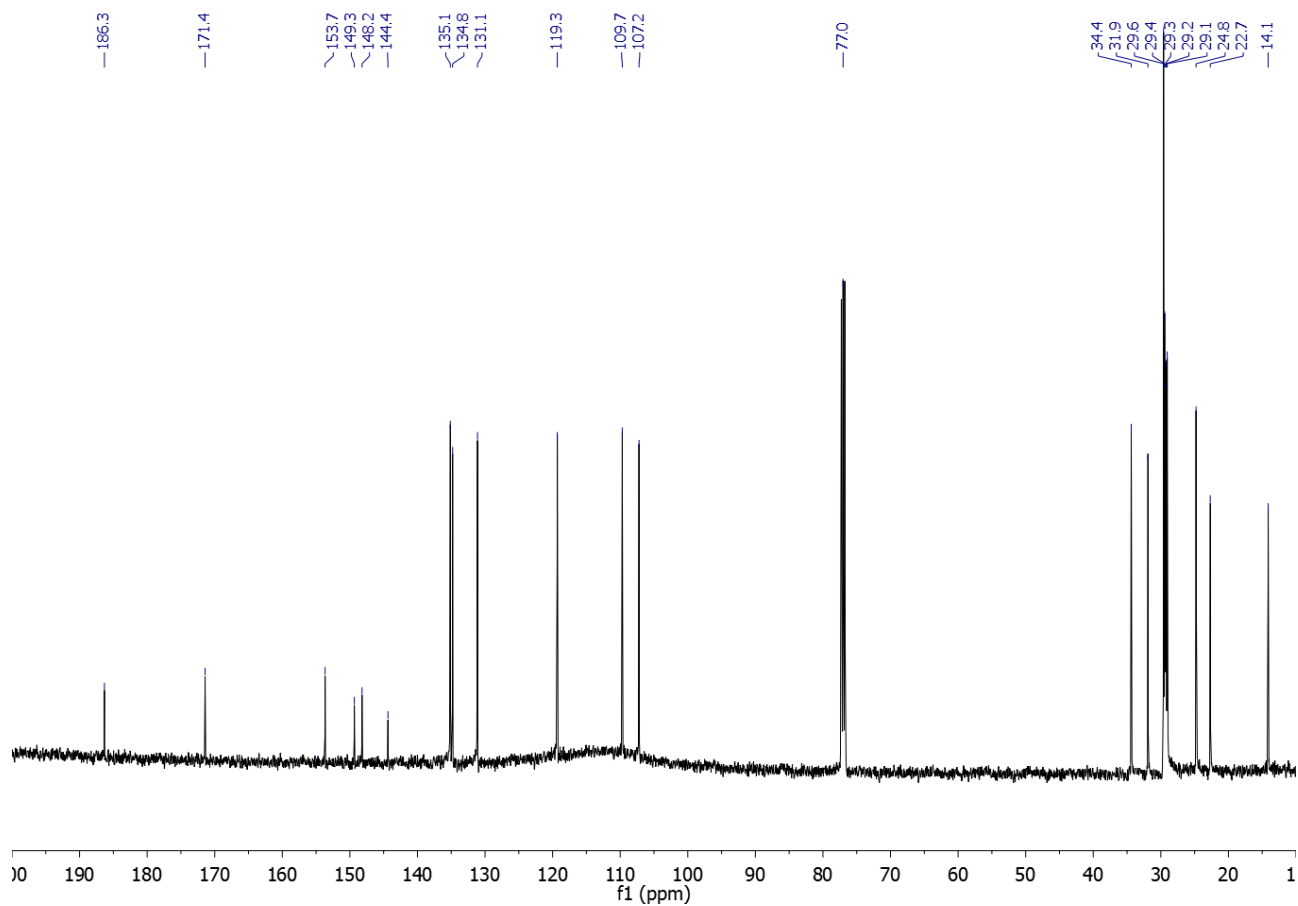

$^1\text{H}$  and  $^{13}\text{C}$  NMR spectra of 7-hydroxyresorufinyl-icosanoate (1e)

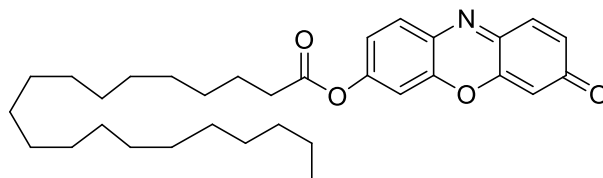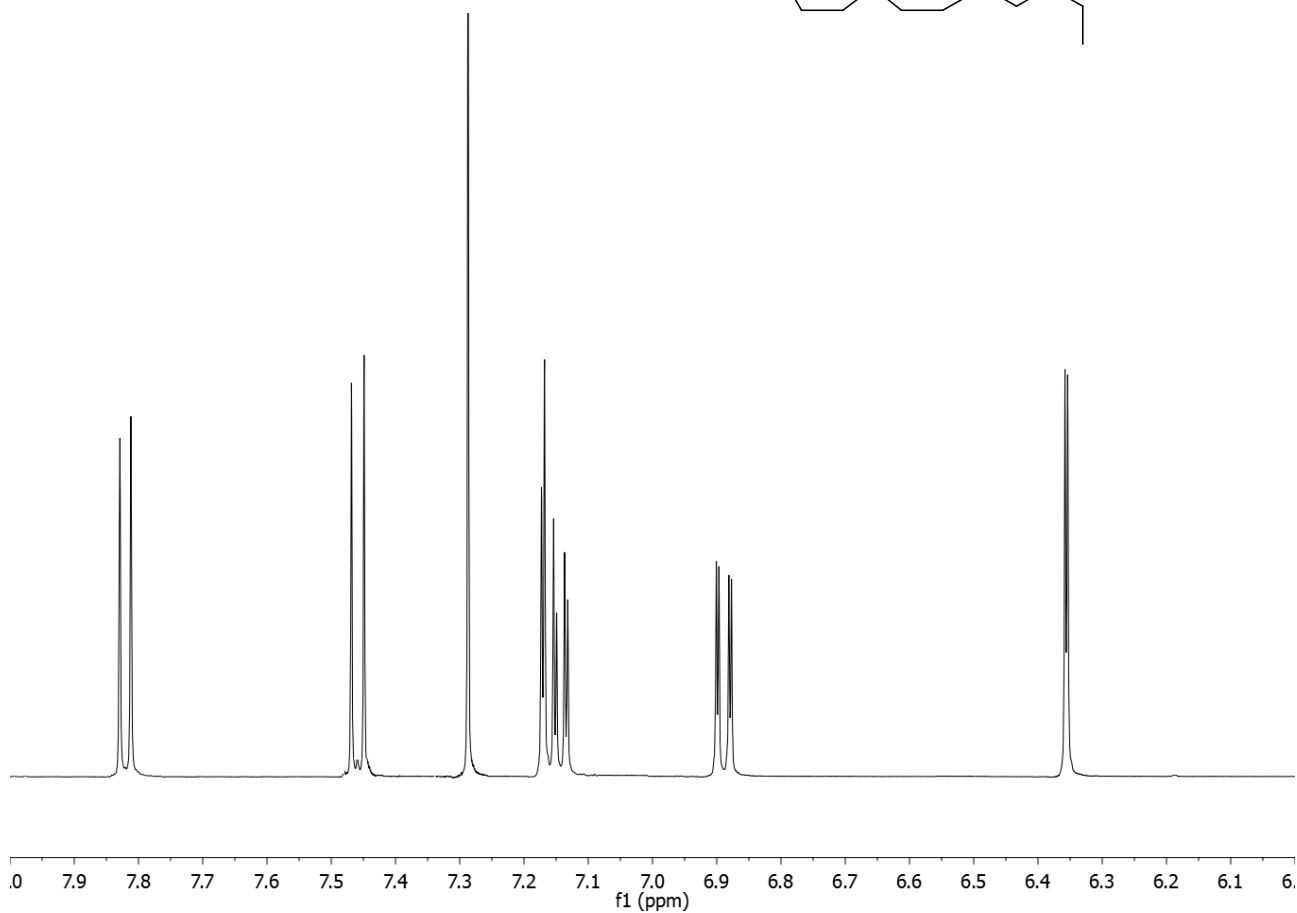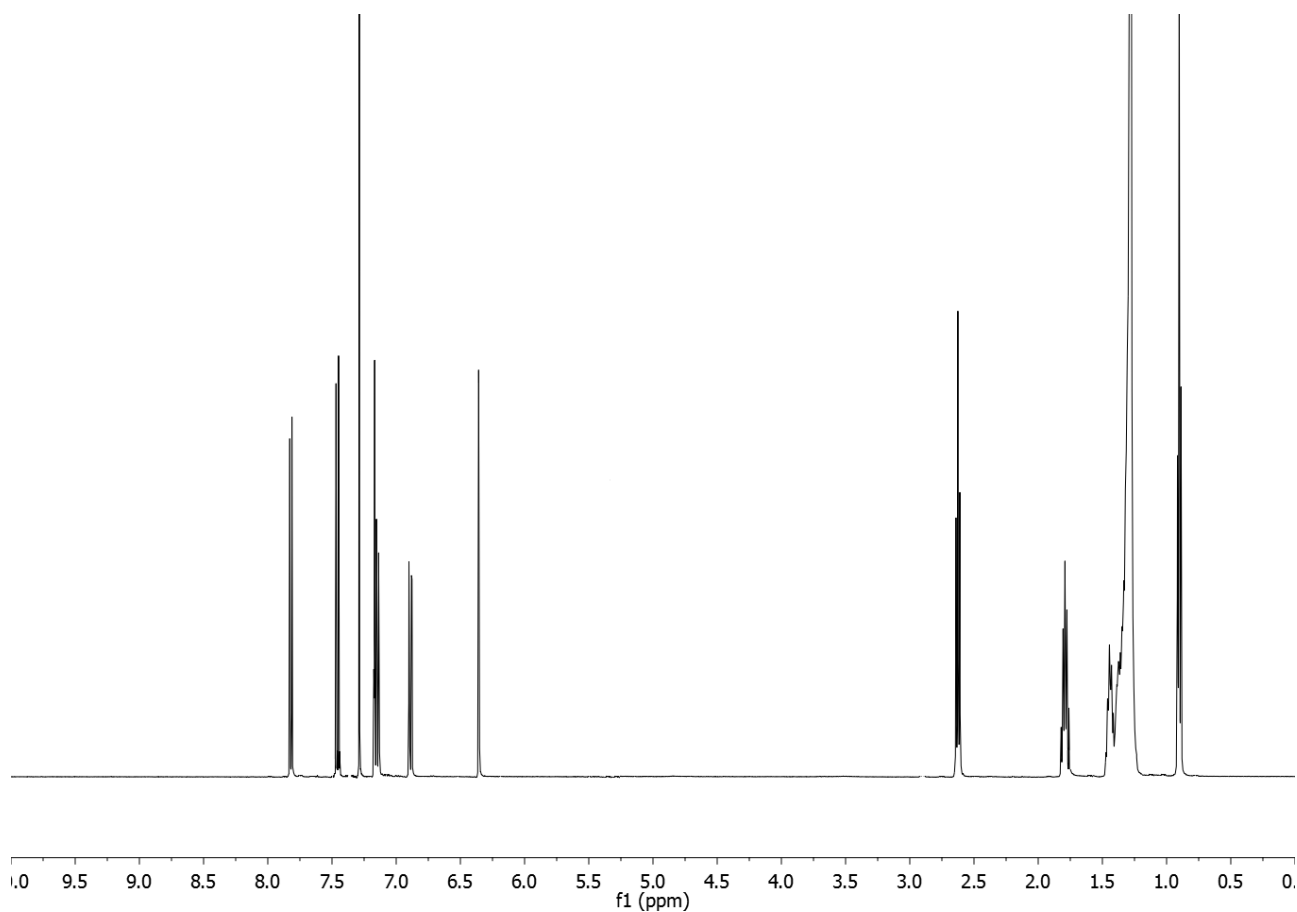

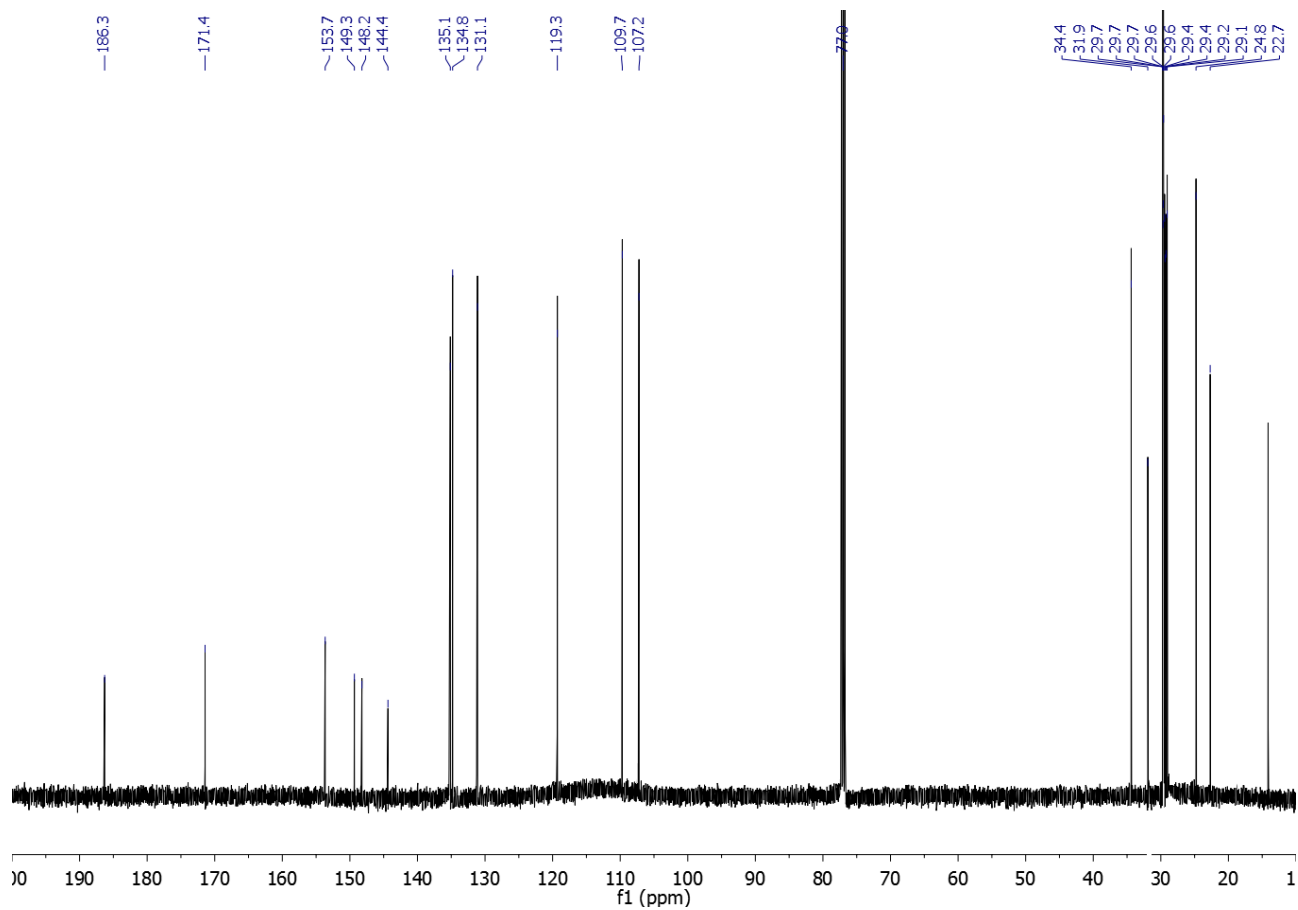

$^1\text{H}$  and  $^{13}\text{C}$  NMR spectra  
of 7-hydroxyresorufinyl-oleate (**1f**)

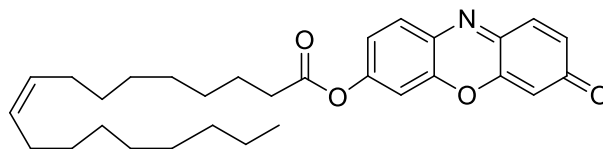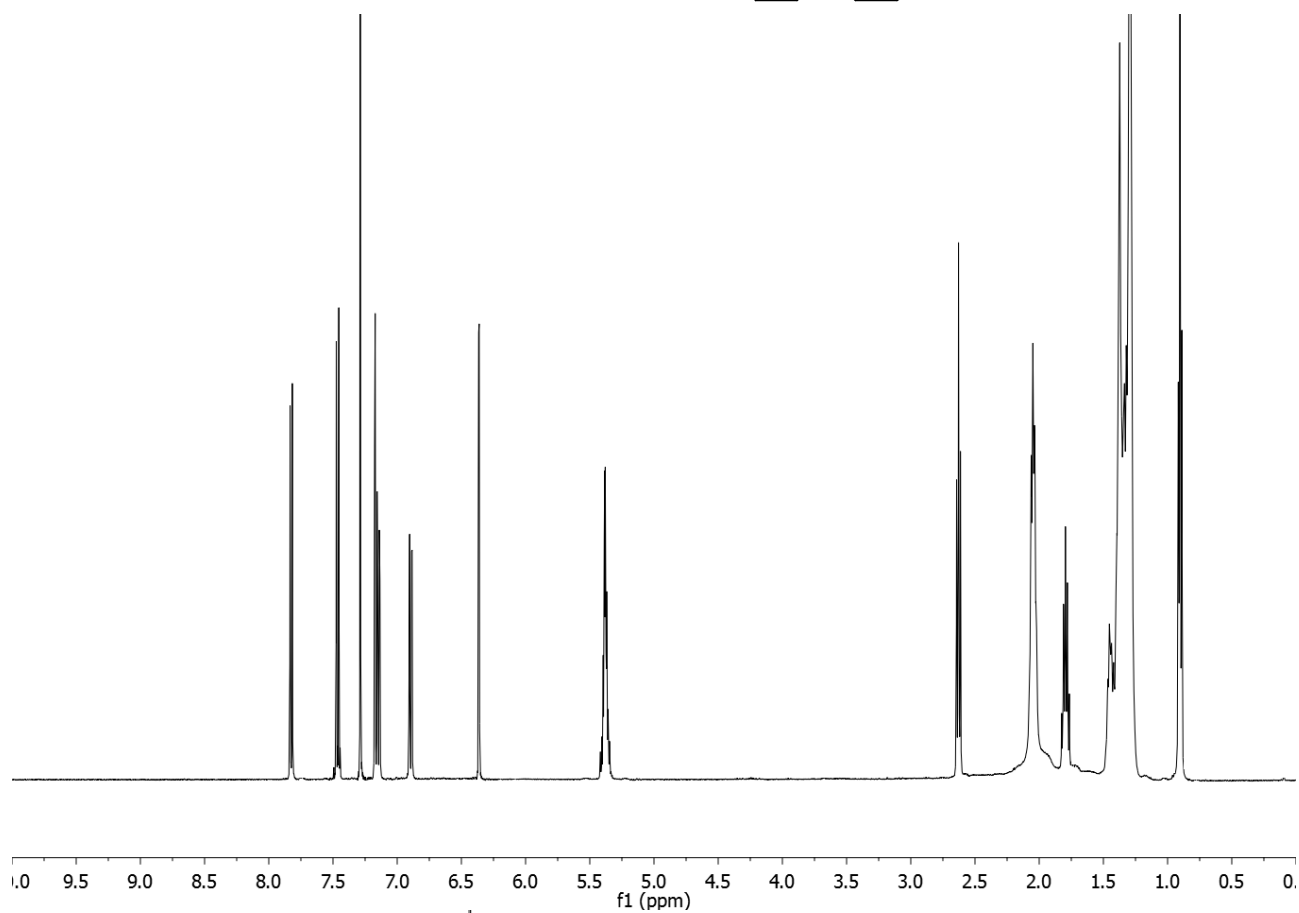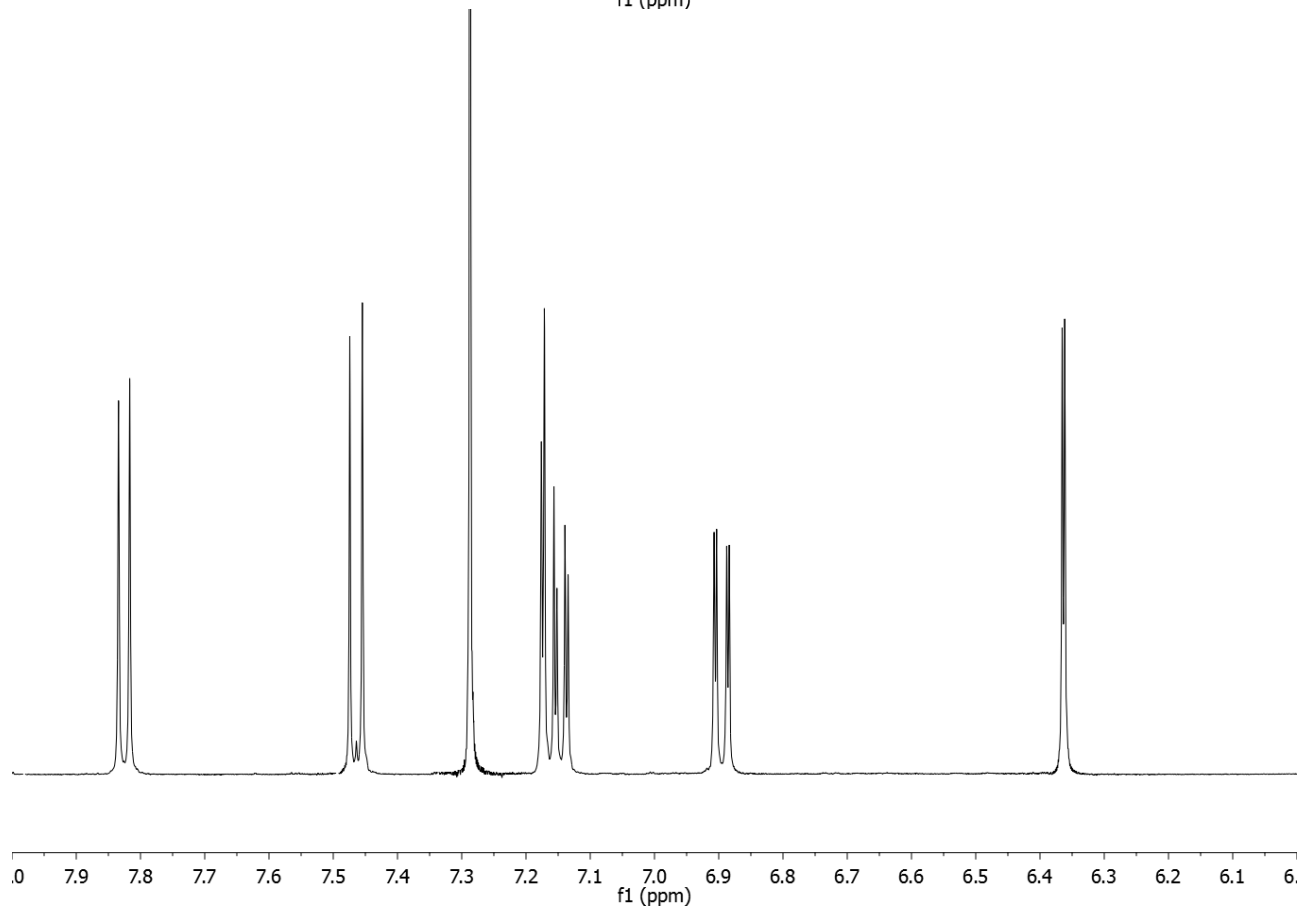

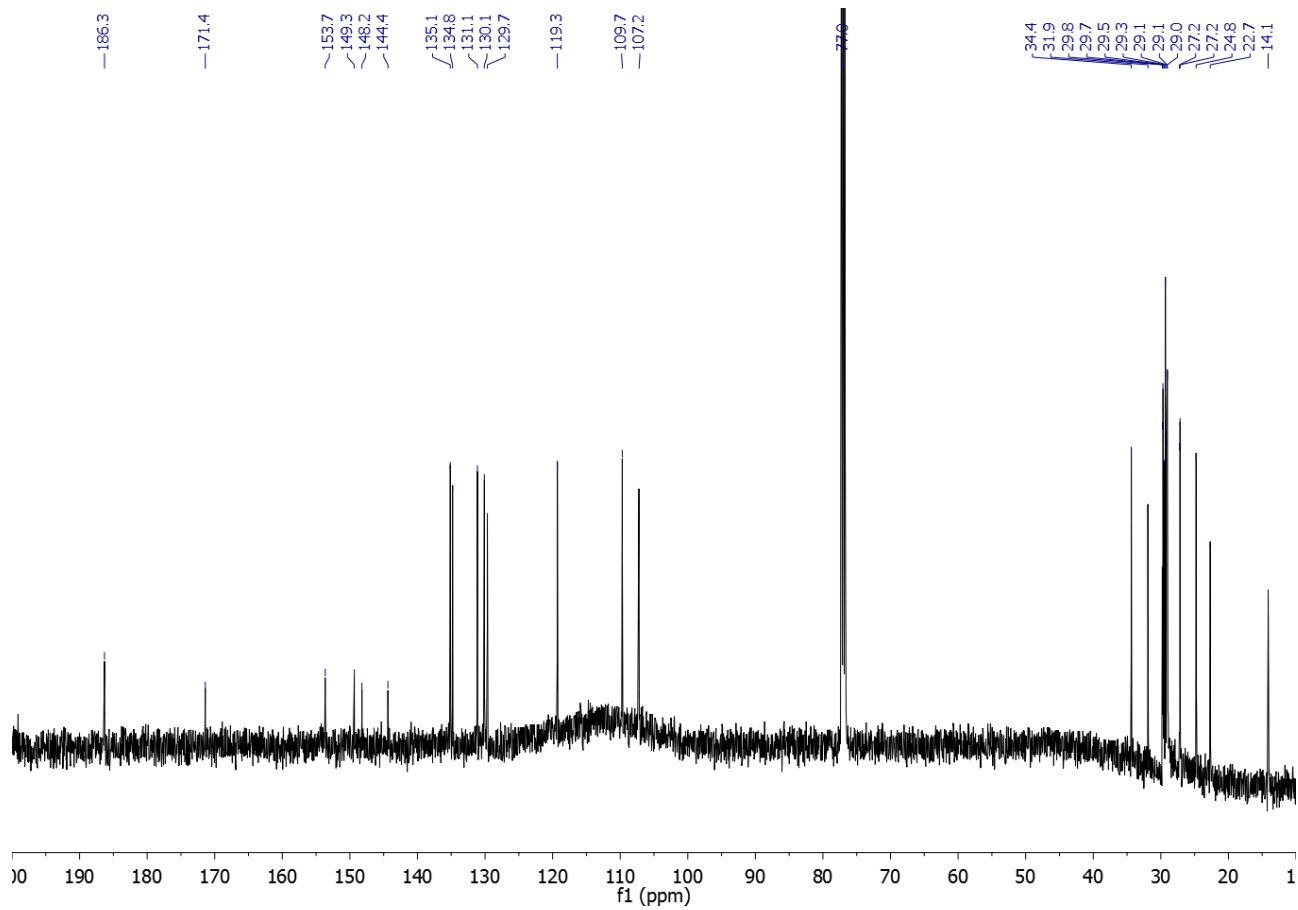

$^1\text{H}$  and  $^{13}\text{C}$  NMR spectra of 7-hydroxyresorufinyl-arachidonate (**1g**)

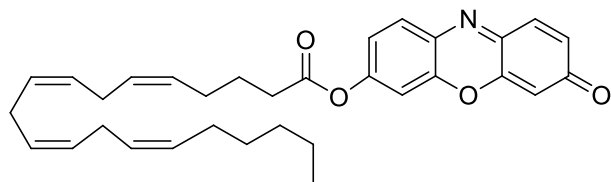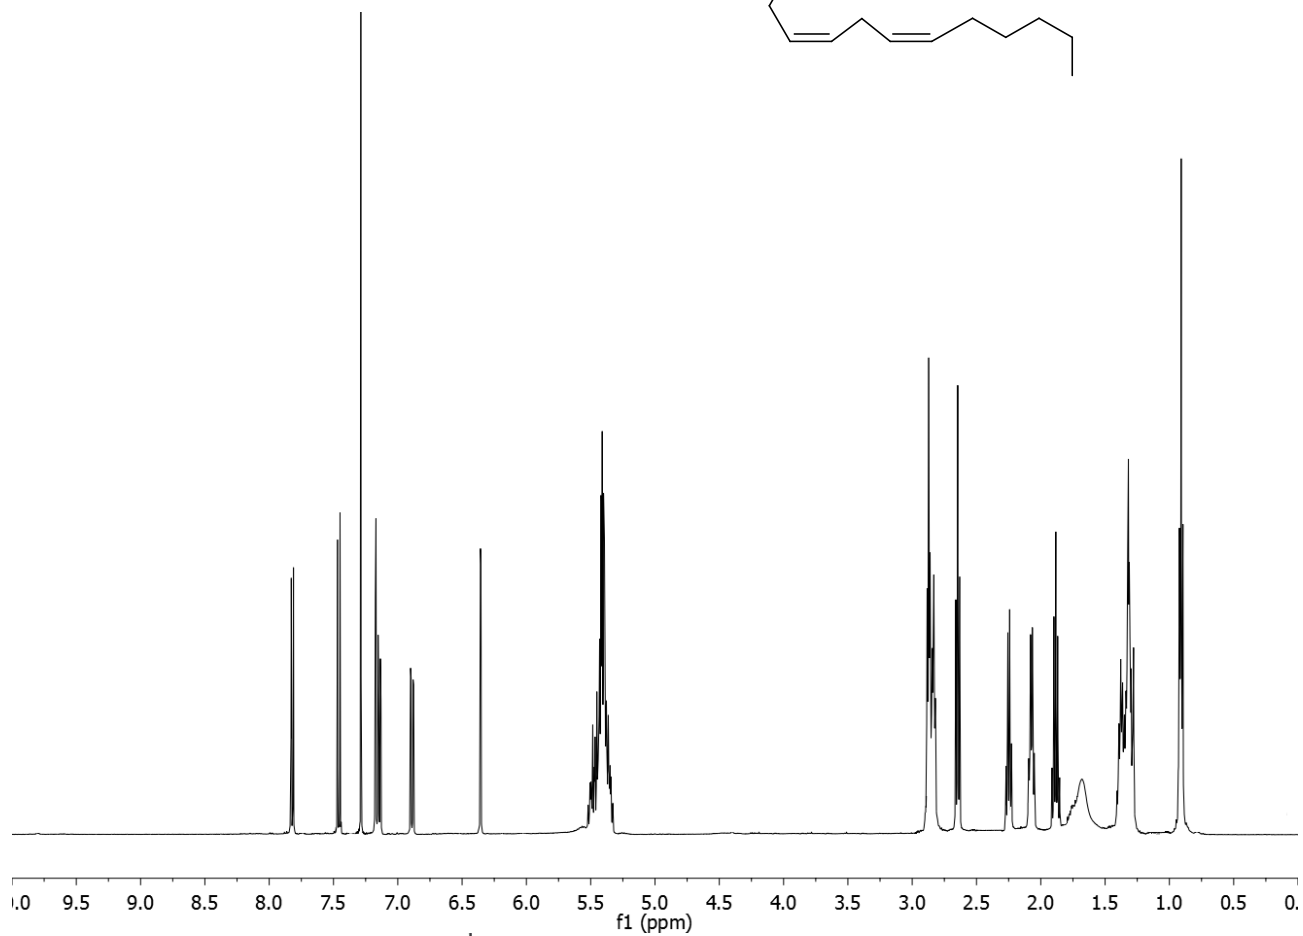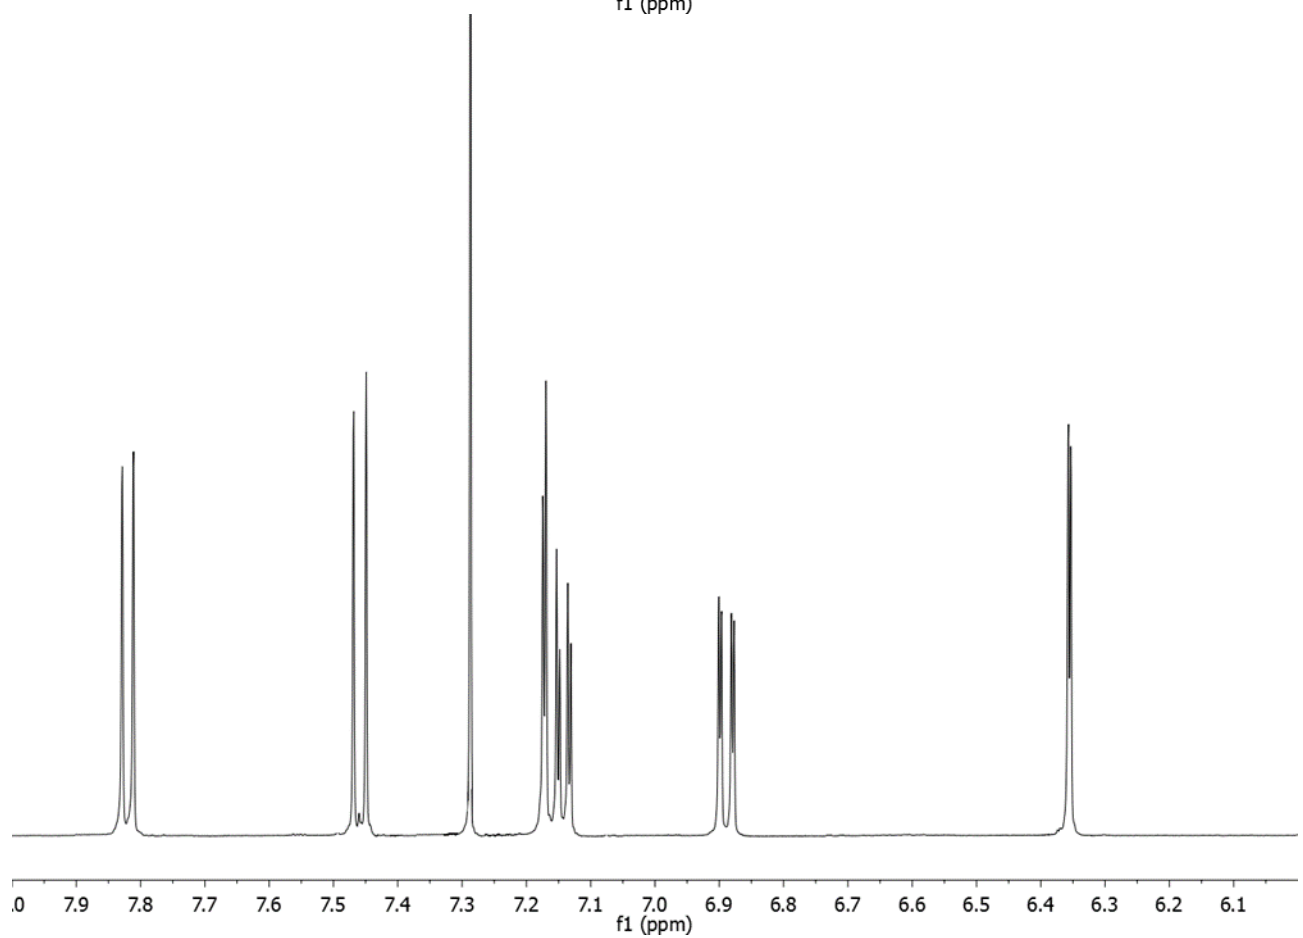

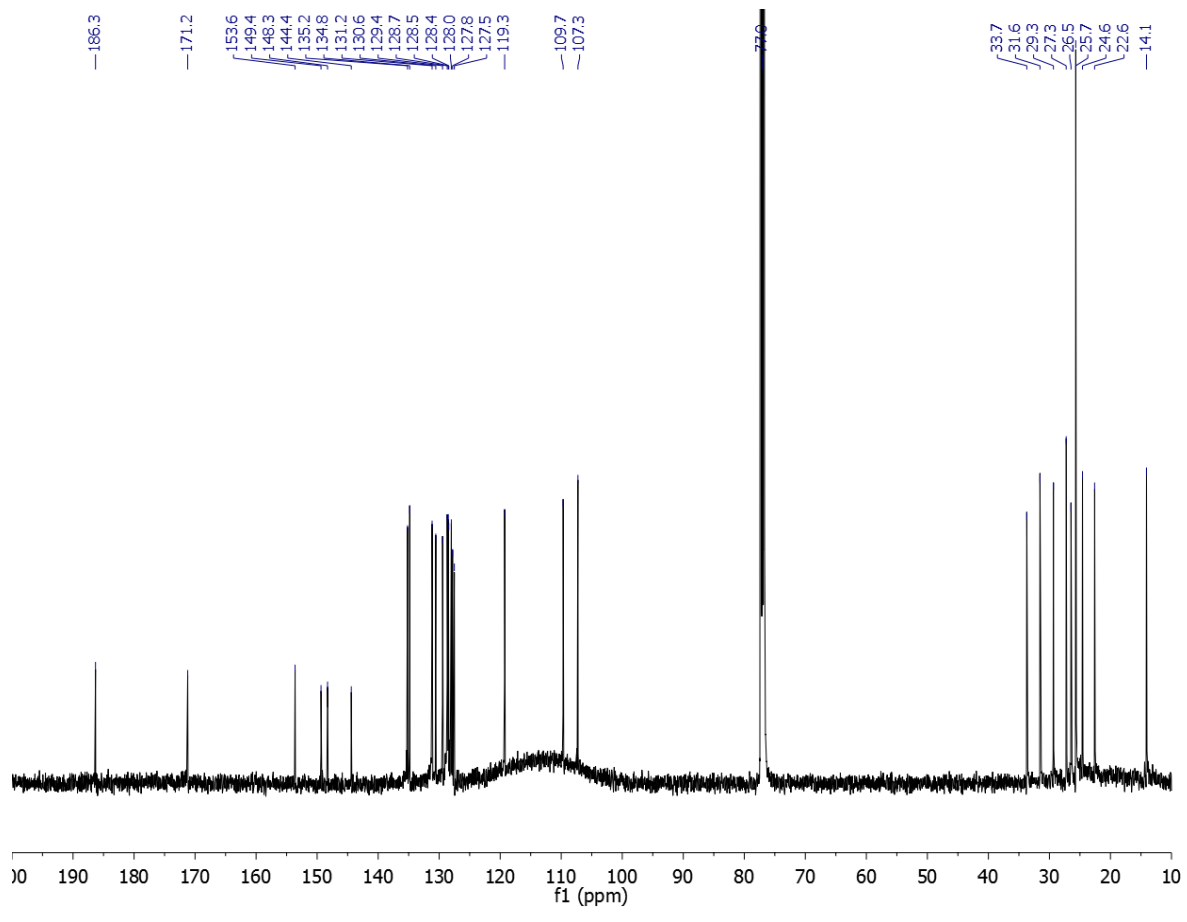



$^1\text{H}$  and  $^{13}\text{C}$  NMR spectra of 7-hydroxyresorufinyl-2-methylhexanoate (**1h**)

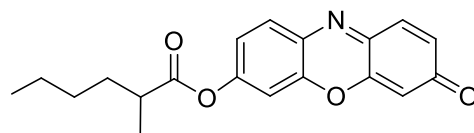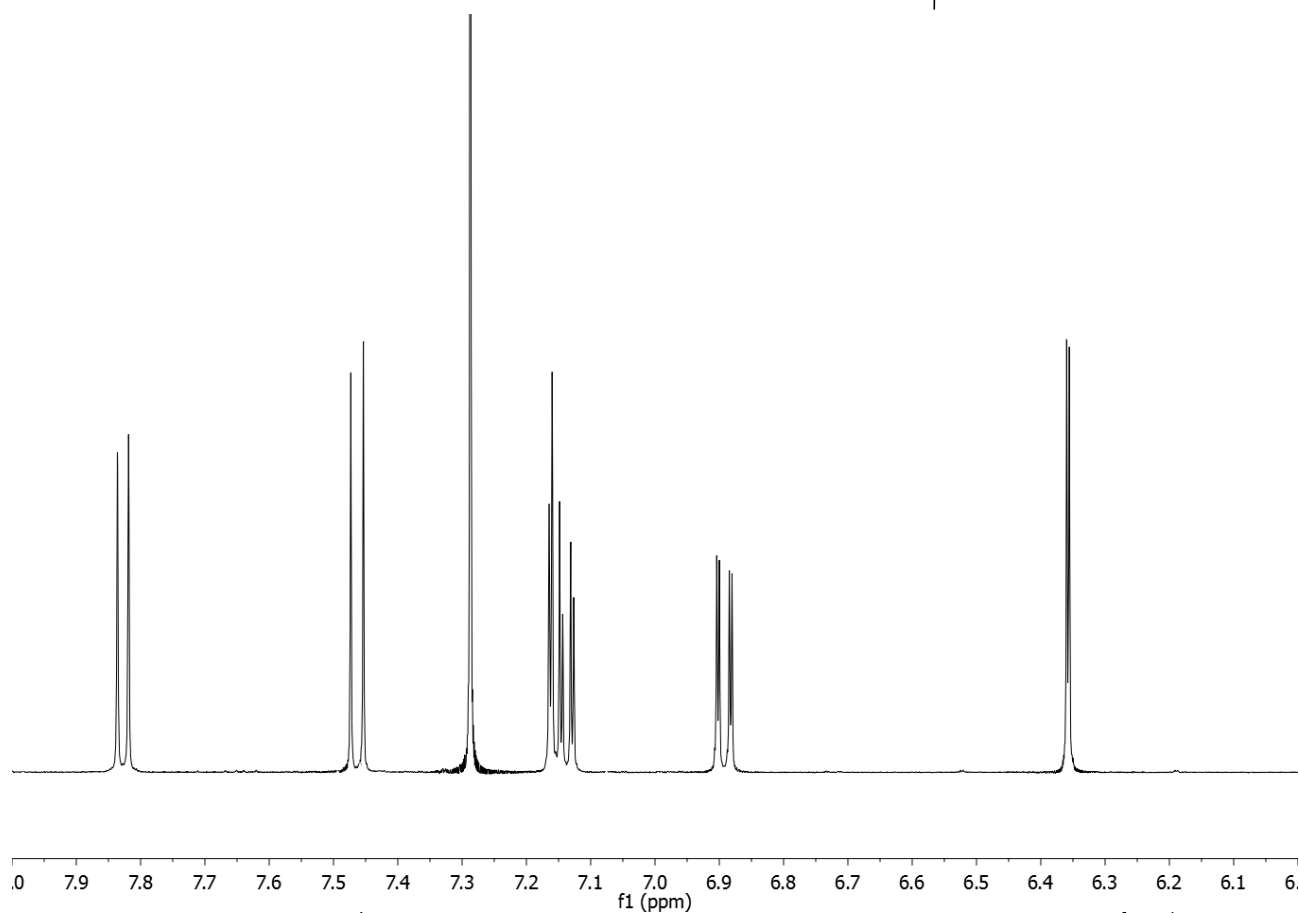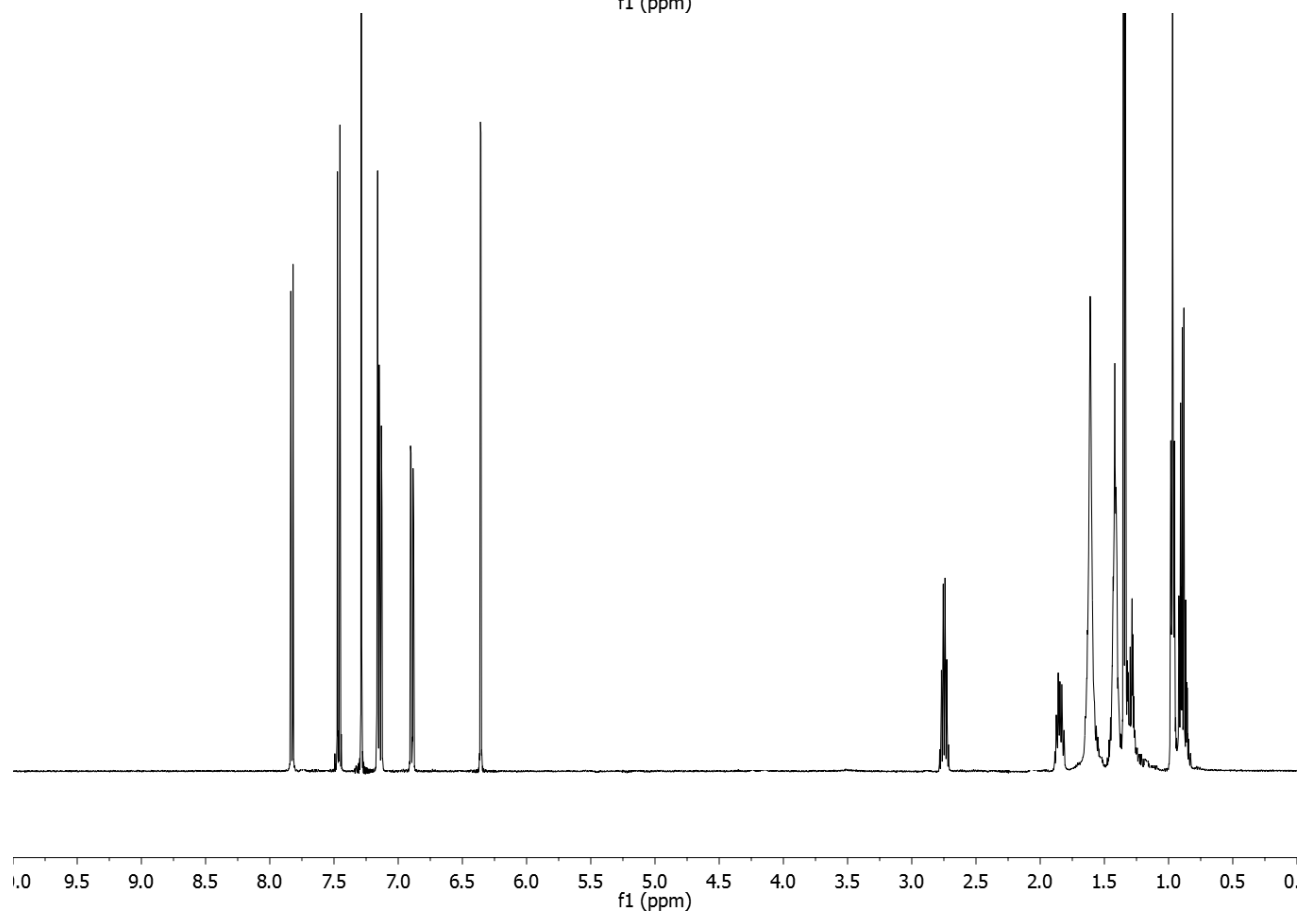

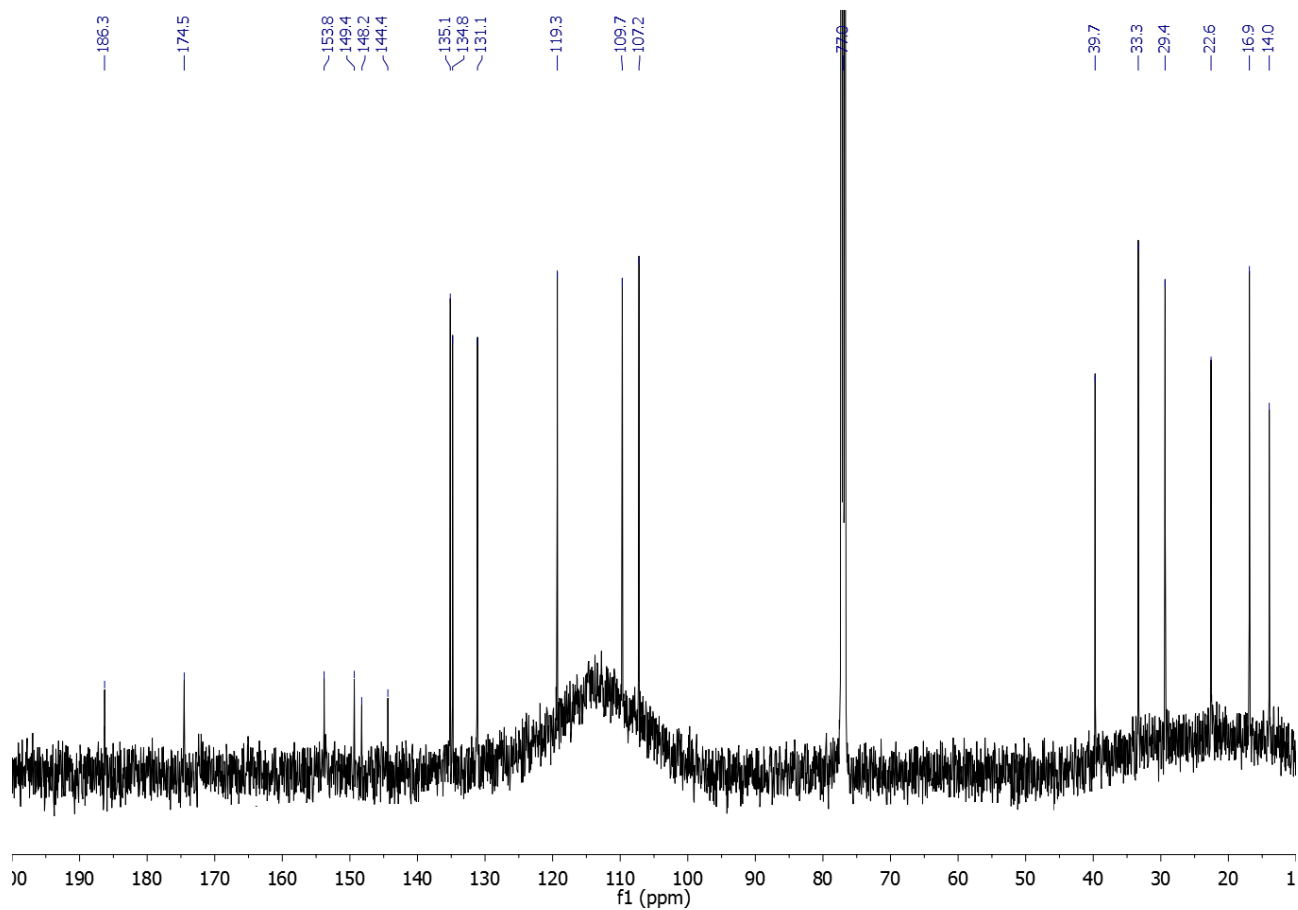

$^1\text{H}$  and  $^{13}\text{C}$  NMR spectra of 7-hydroxyresorufinyl-2-ethylhexanoate (**1i**)

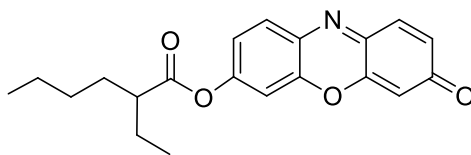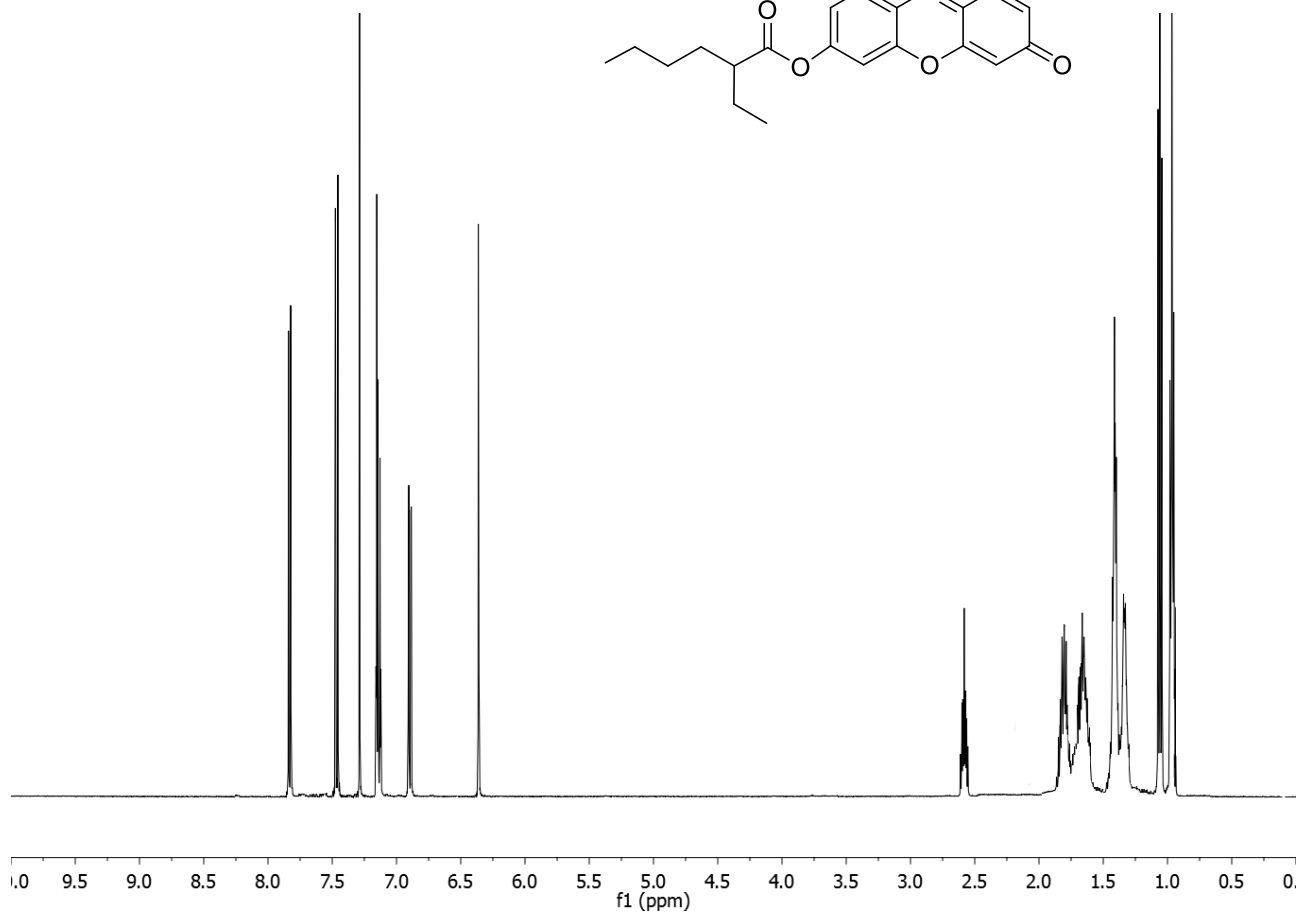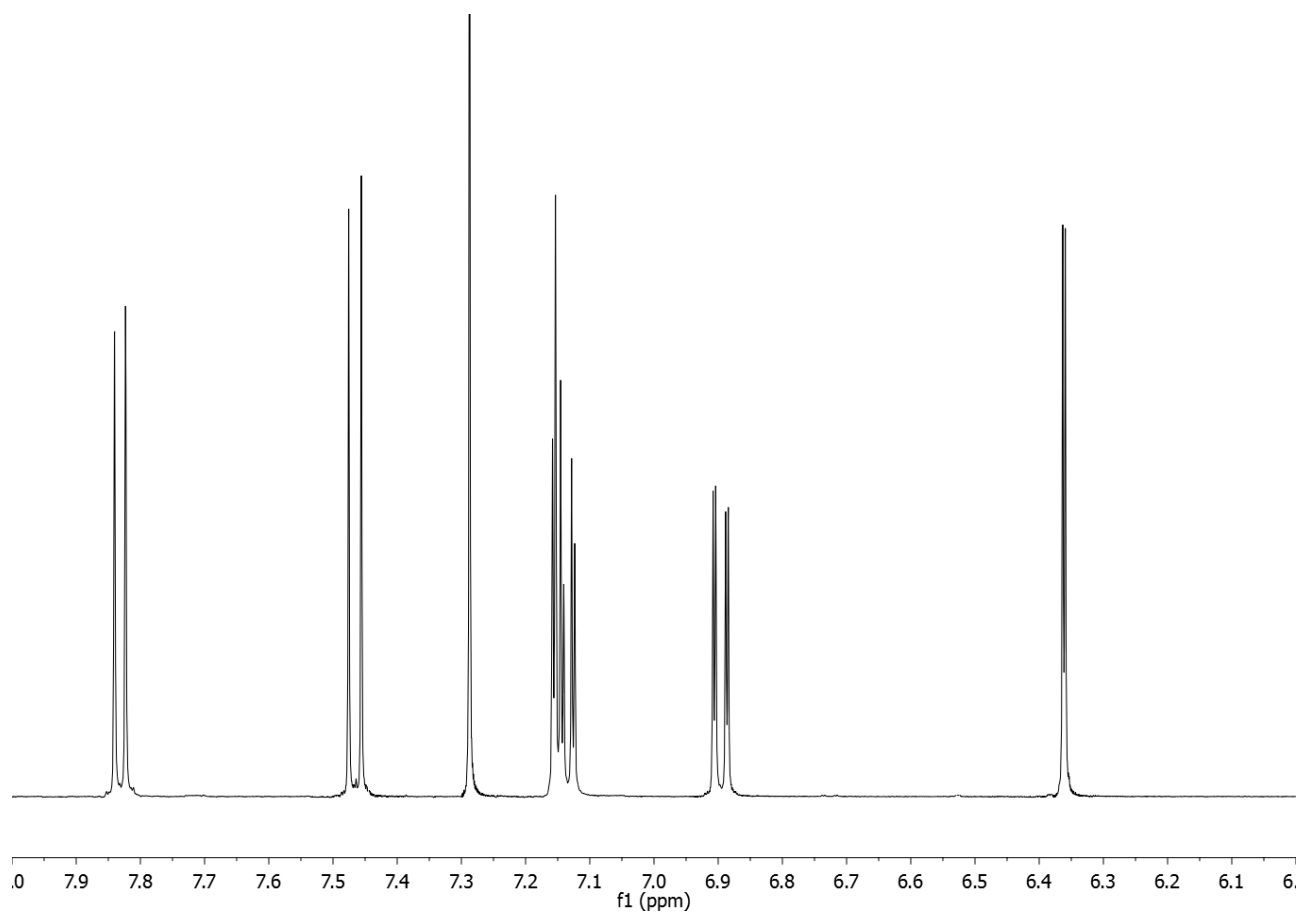

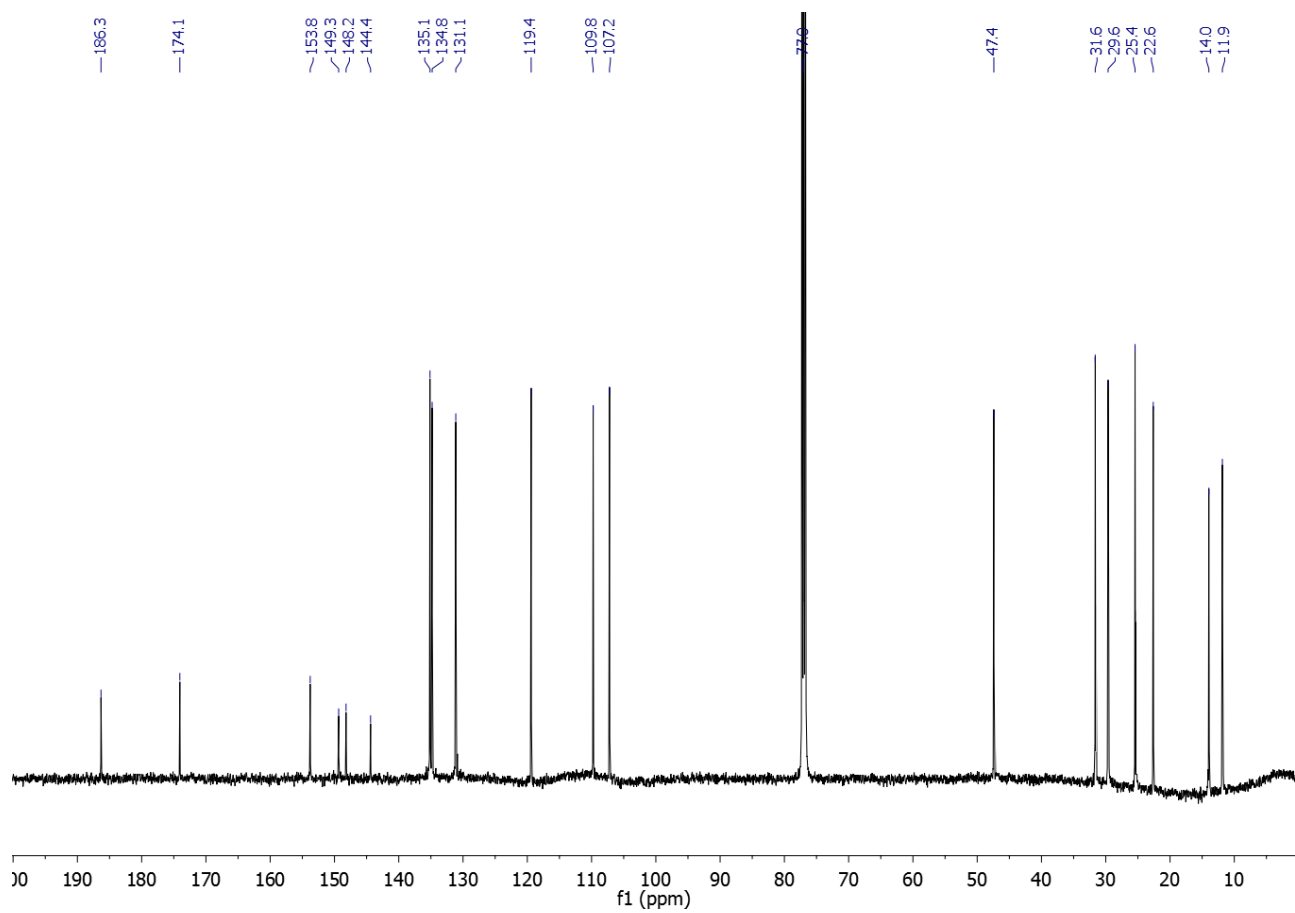

$^1\text{H}$  and  $^{13}\text{C}$  NMR spectra  
of 7-hydroxyresorufinyl-2-butyloctanoate (**1j**)

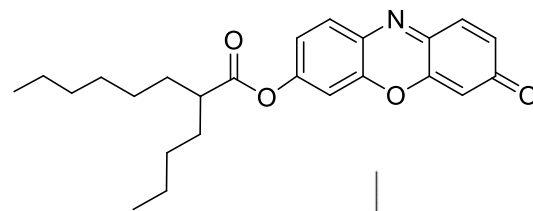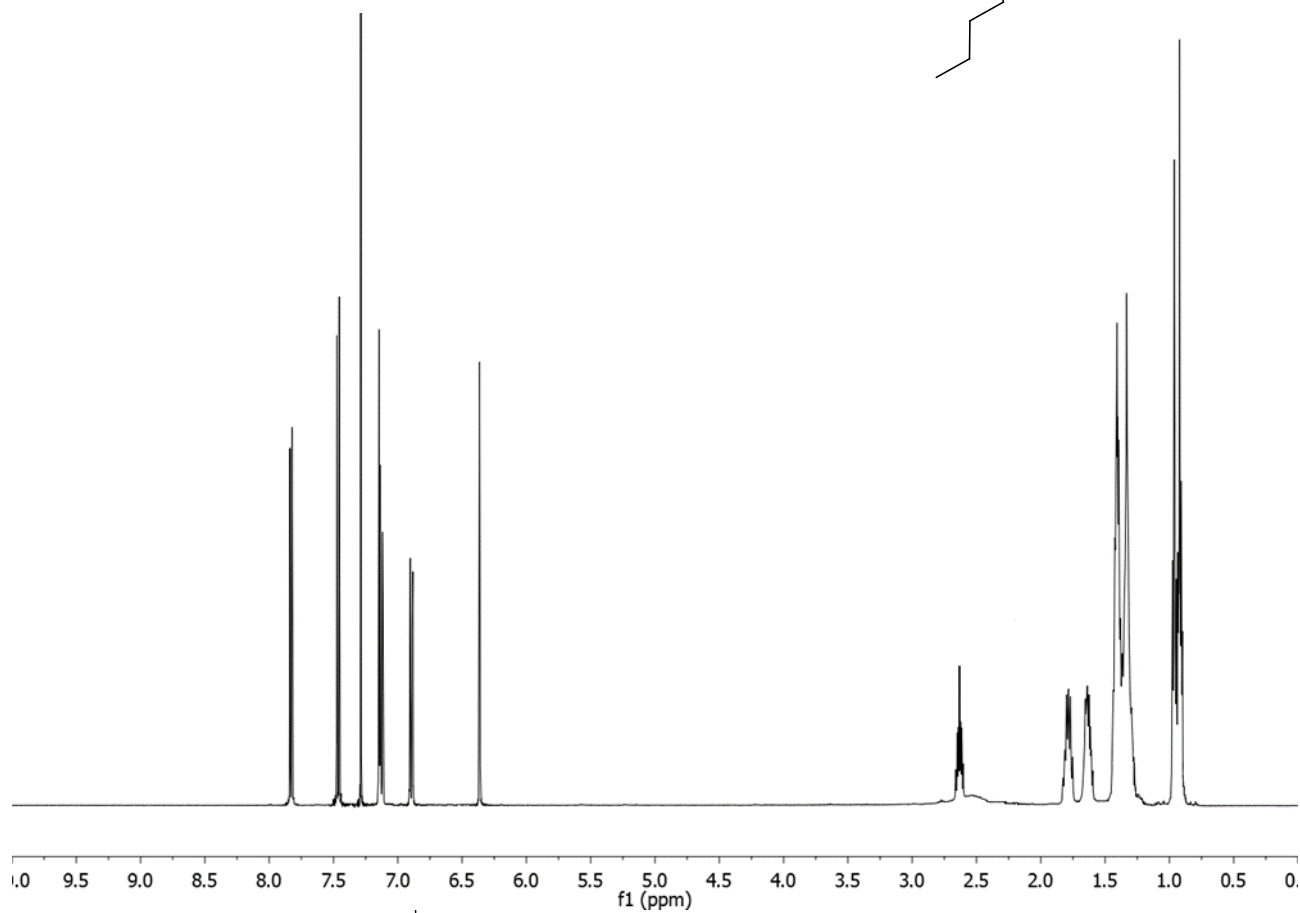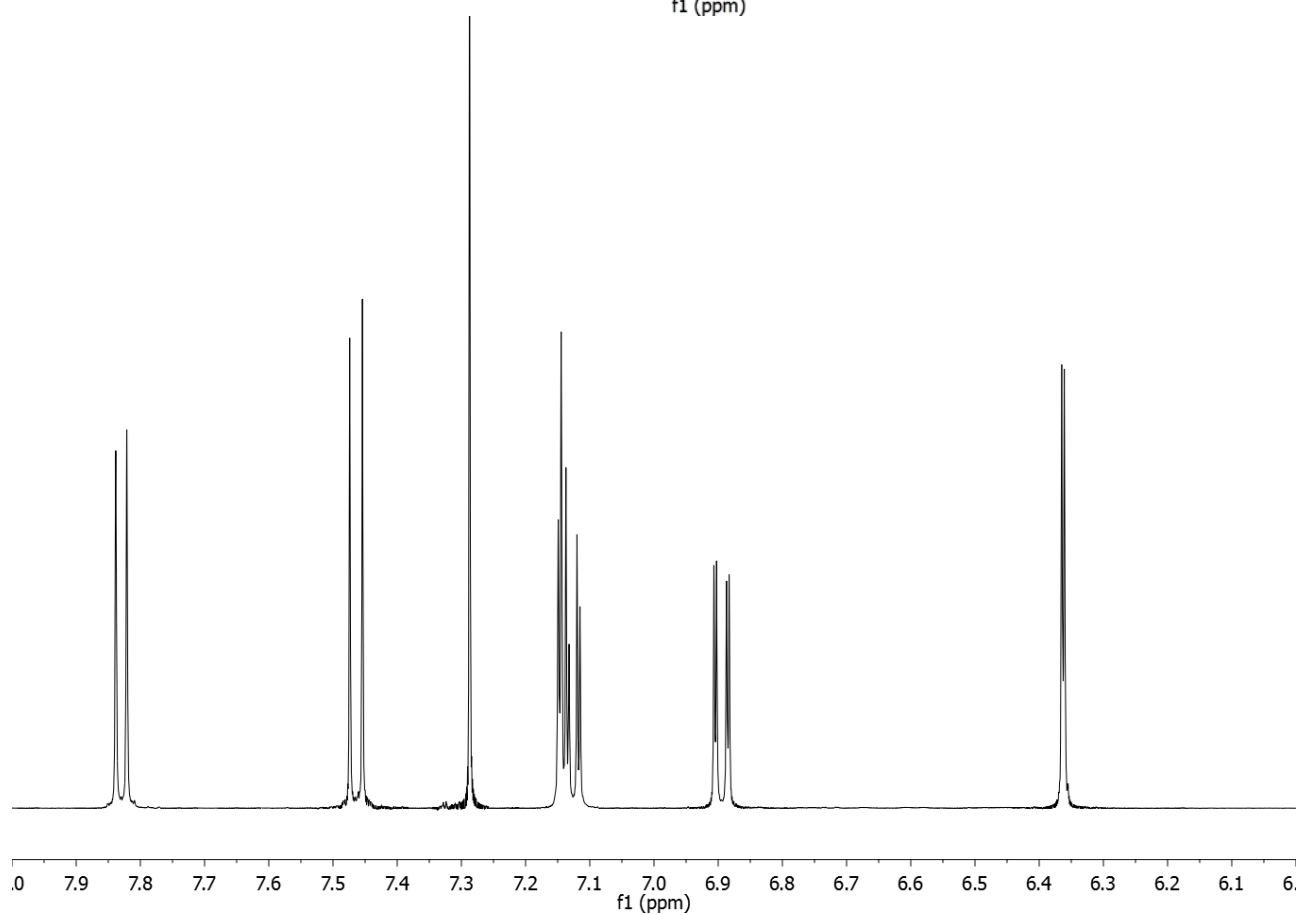

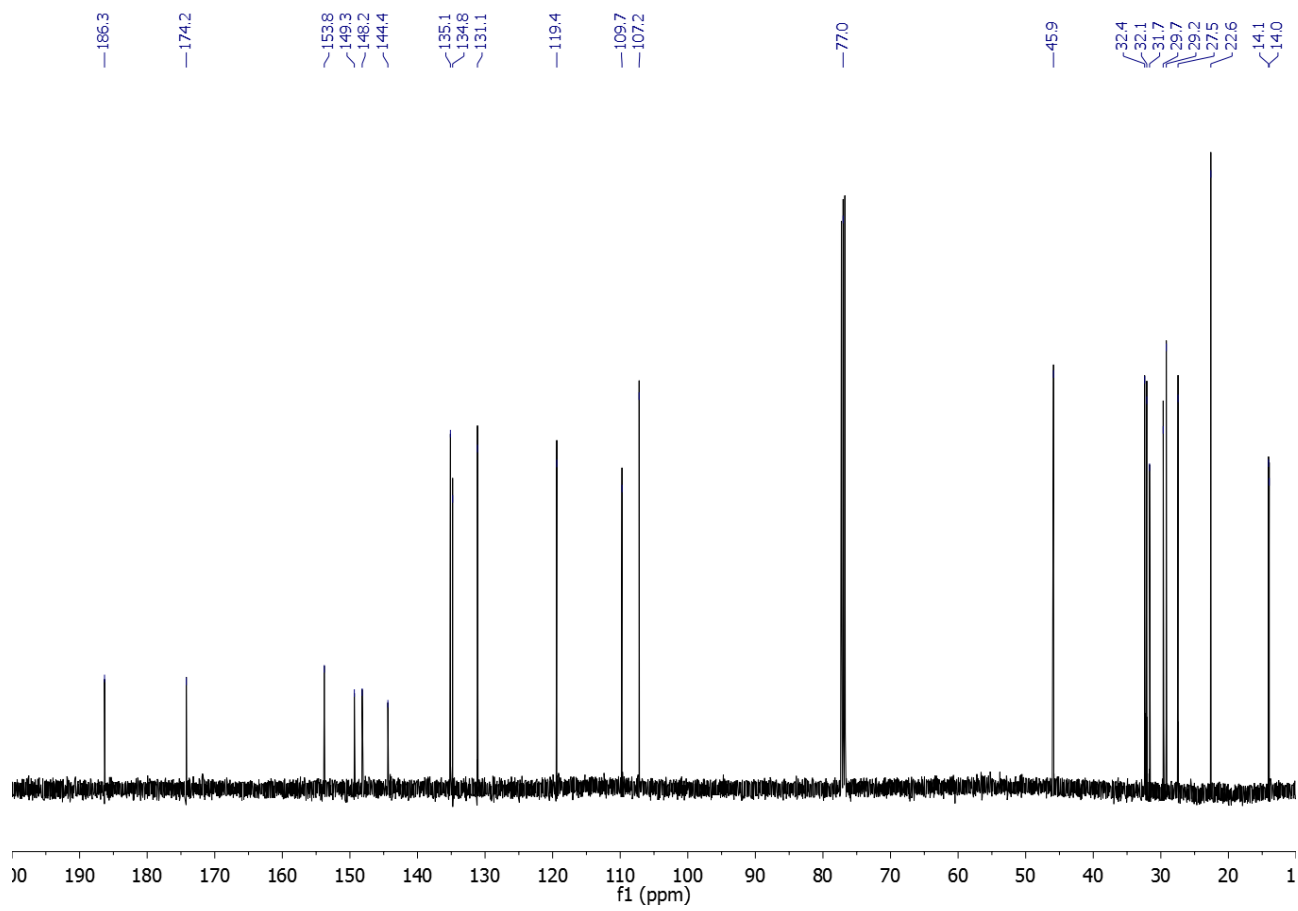

$^1\text{H}$  and  $^{13}\text{C}$  NMR spectra of 7-hydroxyresorufinyl-2-benzoate (**1k**)

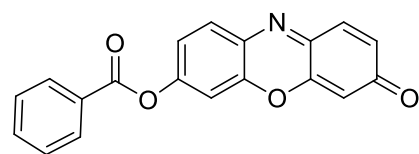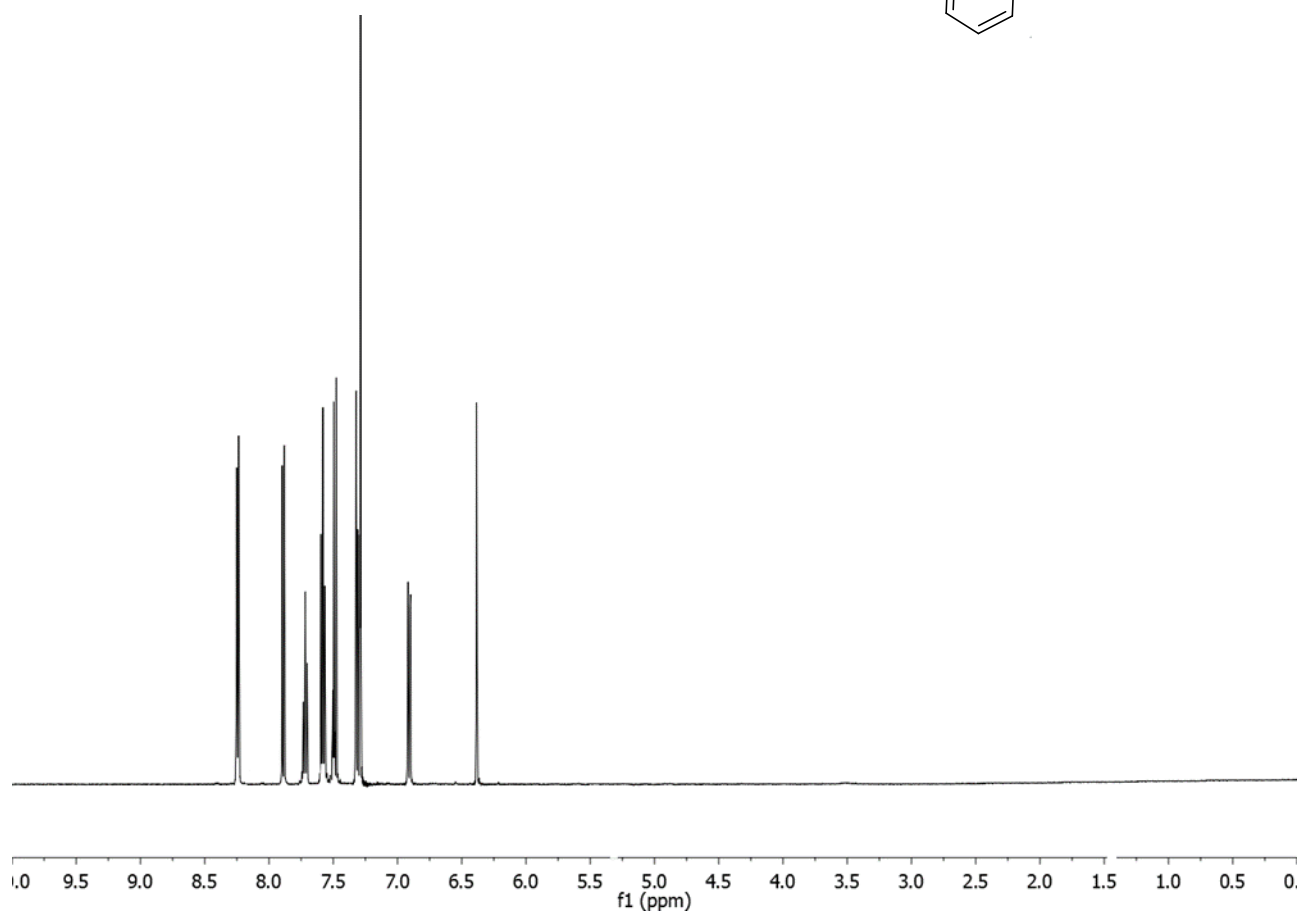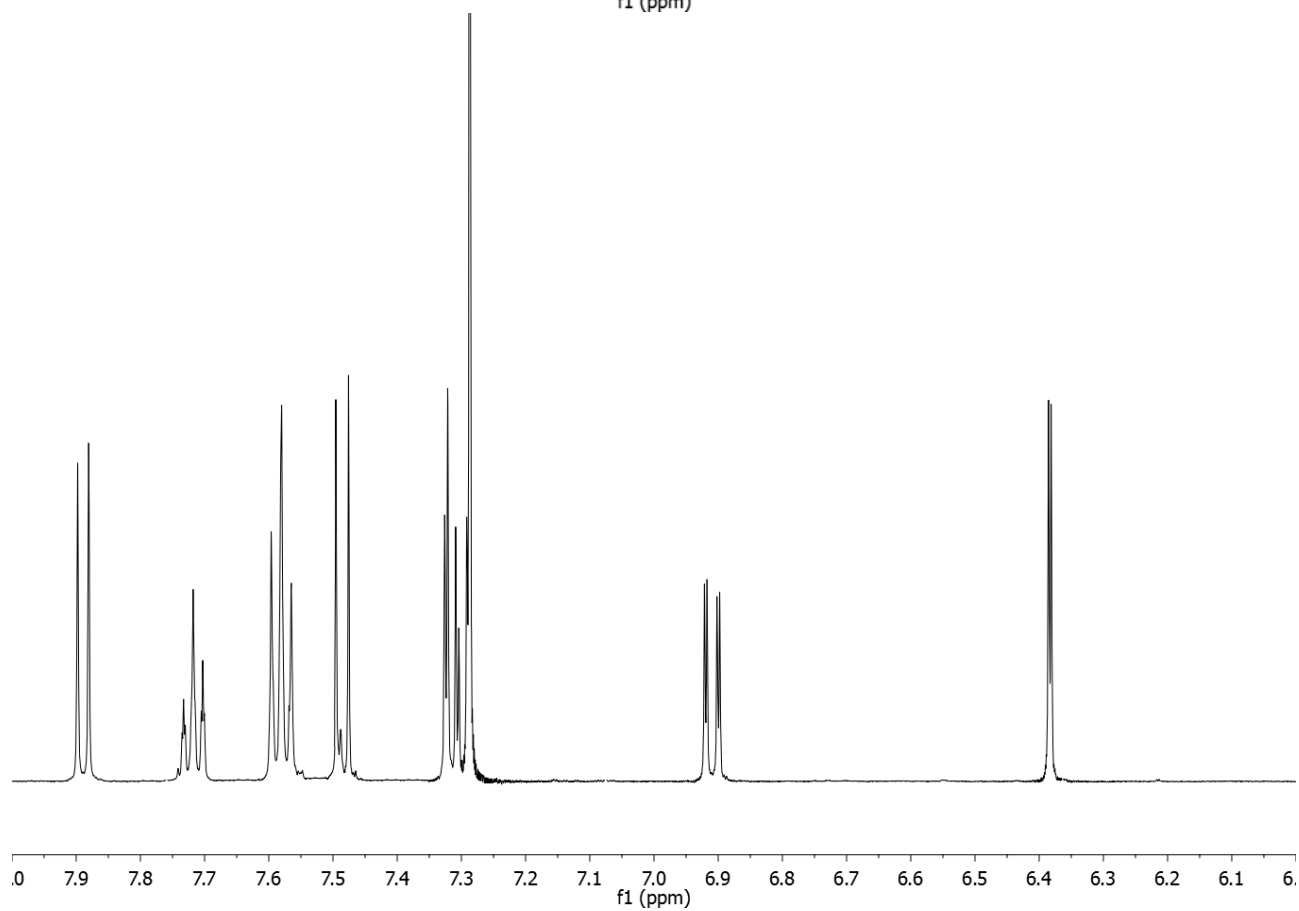

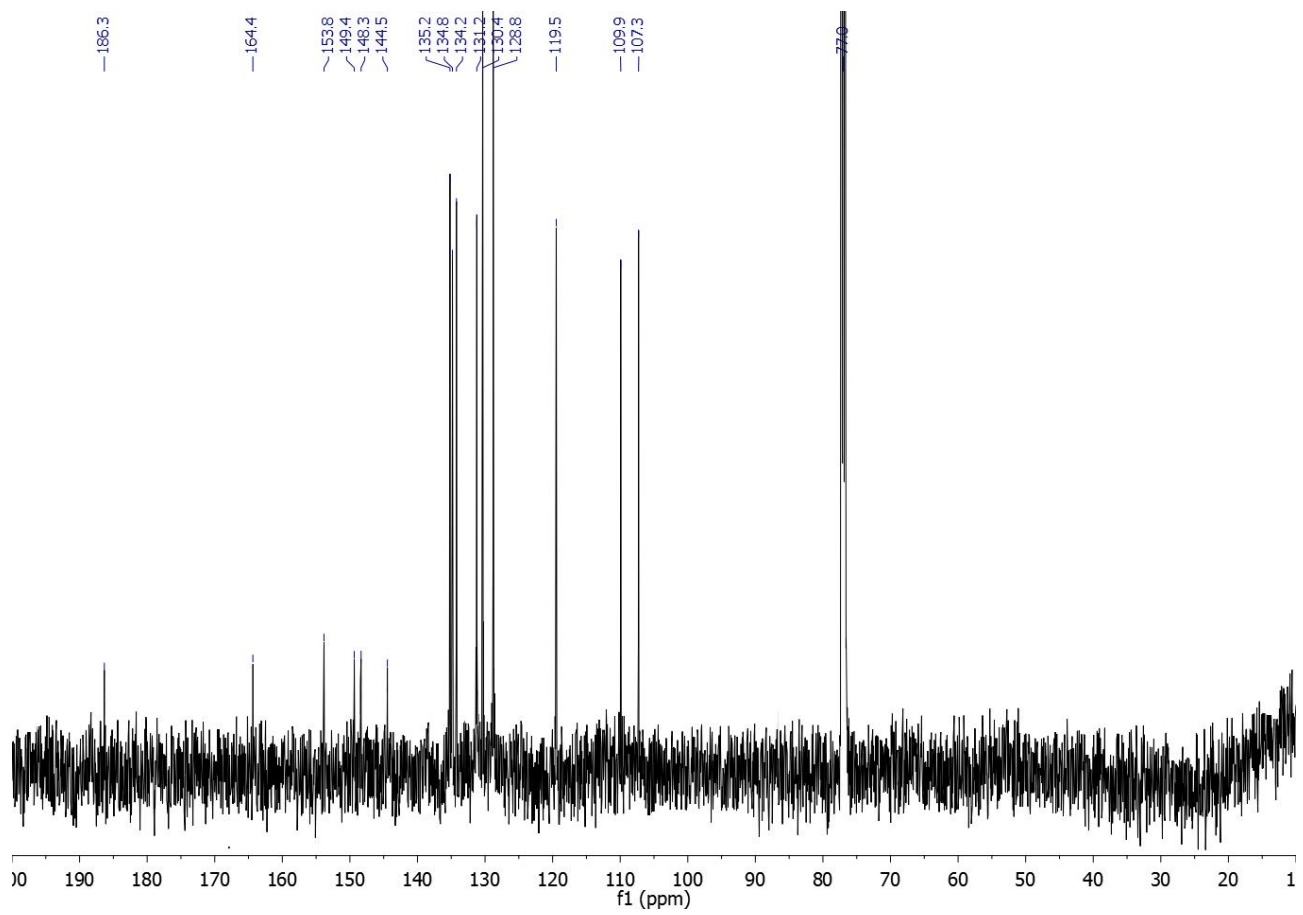

Supplement: molecules-24-02241-s001.pdf [file molecules-24-02241-s001.pdf]
